RESEARCH ARTICLE

# Identification of New Genes Contributing to the Extreme Radioresistance of *Deinococcus radiodurans* Using a Tn5-Based Transposon Mutant Library

Rémi Dulermo<sup>‡a</sup>, Takefumi Onodera<sup>‡b</sup>, Geneviève Coste<sup>®</sup>, Fanny Passot, Murielle Dutertre, Martine Porteron, Fabrice Confalonieri, Suzanne Sommer, Cécile Pasternak\*

Univ. Paris-Sud, Institute for Integrative Biology of the Cell (I2BC), Université Paris Saclay, CEA, CNRS, Orsay, France

© These authors contributed equally to this work.

‡a Current address: INRA, UMR 1319 Micalis, Jouy en Josas, France

‡b Current address: Cooperative Research Center of Life Sciences, Kobe Gakuin University, Nishi-ku, Kobe, Japan

\* [cecile.pasternak@igmors.u-psud.fr](mailto:cecile.pasternak@igmors.u-psud.fr)

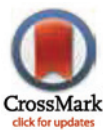

**OPEN ACCESS**

**Citation:** Dulermo R, Onodera T, Coste G, Passot F, Dutertre M, Porteron M, et al. (2015) Identification of New Genes Contributing to the Extreme Radioresistance of *Deinococcus radiodurans* Using a Tn5-Based Transposon Mutant Library. PLoS ONE 10(4): e0124358. doi:10.1371/journal.pone.0124358

**Academic Editor:** John R Battista, Louisiana State University and A & M College, UNITED STATES

**Received:** December 18, 2014

**Accepted:** March 2, 2015

**Published:** April 17, 2015

**Copyright:** © 2015 Dulermo et al. This is an open access article distributed under the terms of the [Creative Commons Attribution License](https://creativecommons.org/licenses/by/4.0/), which permits unrestricted use, distribution, and reproduction in any medium, provided the original author and source are credited.

**Data Availability Statement:** All relevant data are within the paper and its Supporting Information files.

**Funding:** This work was supported by Agence Nationale de la Recherche, ANR Radioresistance-11-BSV3-01701 to SS. The funders had no role in study design, data collection and analysis, decision to publish, or preparation of the manuscript.

**Competing Interests:** The authors have declared that no competing interests exist.

## Abstract

Here, we have developed an extremely efficient *in vivo* Tn5-based mutagenesis procedure to construct a *Deinococcus radiodurans* insertion mutant library subsequently screened for sensitivity to genotoxic agents such as  $\gamma$  and UV radiations or mitomycin C. The genes inactivated in radiosensitive mutants belong to various functional categories, including DNA repair functions, stress responses, signal transduction, membrane transport, several metabolic pathways, and genes of unknown function. Interestingly, preliminary characterization of previously undescribed radiosensitive mutants suggests the contribution of cyclic di-AMP signaling in the recovery of *D. radiodurans* cells from genotoxic stresses, probably by modulating several pathways involved in the overall cell response. Our analyses also point out a new transcriptional regulator belonging to the GntR family, encoded by *DR0265*, and a predicted RNase belonging to the newly described Y family, both contributing to the extreme radioresistance of *D. radiodurans*. Altogether, this work has revealed new cell responses involved either directly or indirectly in repair of various cell damage and confirmed that *D. radiodurans* extreme radiation resistance is determined by a multiplicity of pathways acting as a complex network.

## Introduction

The extremely radiation resistant organism, *D. radiodurans* has been extensively studied since several decades to elucidate the molecular mechanisms responsible for its exceptional ability to

withstand lethal effects of various DNA-damaging agents, such as ionizing and UV radiation, toxic chemicals and desiccation (for recent reviews, see [1–3]).

Prevalent features playing a key role in this extreme radioresistance have been already described: (i) *D. radiodurans* possesses highly proficient DNA double strand break (DSB) repair mechanisms, as homologous recombination (HR) [4], Extended Synthesis-Dependent Strand Annealing (ESDSA) [5,6], and Single-Strand Annealing (SSA) [7,8], that enable *D. radiodurans* to accurately reassemble its genome from hundreds of DNA fragments produced by irradiation (ii) *D. radiodurans* has also evolved a combination of very efficient non-enzymatic and enzymatic antioxidant defenses which specifically protect proteins against oxidative damage (for reviews, see [3,9,10]) (iii) a highly condensed ring-like nucleoid may also facilitate genome reassembly [11], although this hypothesis is still controversial [9,12].

A rapid and efficient response is required for cell recovery from the various cellular damages induced by irradiation. A subset of *Deinococcus* genus-specific genes, *ddrA*, *ddrB*, *ddrC*, *ddrD*, *ddrI*, *ddrO* (for DNA damage response), and *pprA* (Pleiotropic protein promoting DNA repair), have been identified as strongly induced by exposure to ionizing radiation or desiccation [13]. A common radiation/dessication response motif (RDRM) was found upstream of many highly radiation-induced genes in *D. radiodurans* as well as upstream of their homologs in *D. geothermalis* and *D. deserti*, thus defining the RDR regulon [14]. However, the regulatory mechanisms underlying the response of *D. radiodurans* to radiation are still poorly understood. The protein IrrE (also referred to as PprI), was described as a general switch, up-regulating expression of various proteins in *D. radiodurans* or *Deinococcus deserti* [15–17]. DdrO was proposed to be the global transcriptional regulator of the RDR regulon [14], and was recently shown to be cleaved in an IrrE-dependent manner upon exposure to ionizing radiation [17].

Finally, it now appears that the extreme radiation resistance of *D. radiodurans* is also due to a combination of diverse metabolic and regulatory pathways, but the links making a comprehensive network from these various mechanisms is still missing and several factors acting in these pathways still remain to be discovered.

Large-scale mutant libraries remain an efficient method to identify individual proteins required for a complex biological response such as for radiation resistance. Early efforts were based upon classical MNNG (*N*-methyl-*N'*-nitro-*N*-nitrosoguanidine) mutagenesis technique but this approach identified only a few new *D. radiodurans* loci due to the difficulties to map point mutations [18,19]. The transcriptome and proteome approaches have identified differentially regulated genes after exposure to ionizing radiation and desiccation, [13,20–23], but did not allow identification of genes constitutively expressed for cell defense against genotoxic stresses.

Here, we describe a highly efficient *D. radiodurans in vivo* mutagenesis method based on a hyperactive version of the Tn5 transposition system, carried by a temperature-sensitive vector suitable for *D. radiodurans* [24] as transposon delivery system. This system combines mutations in the Tn5 transposase encoding gene (*tnp*) as well as in the ends of the transposon [25–28]. The use of this mutagenesis system provide large collections of mutants since insertions of this element into DNA are highly random and the *in vivo* transposition does not need host factors [29,30]. The *D. radiodurans* Tn5-based insertion library has been subsequently screened for sensitivity to  $\gamma$ - and UV rays, as well as after exposure to mitomycin C (MMC). The transposon insertion site was mapped on the genome by arbitrary PCR and sequencing for each of the 206 mutants sensitive to at least one of these DNA damaging agents, mainly  $\gamma$ -rays. This analysis and further determination of the mutant survival rates after  $\gamma$ -irradiation enabled us to identify 37 genes that significantly contribute to the extreme resistance of *D. radiodurans* to genotoxic stresses. These include genes involved in DNA repair, stress responses and various

metabolic processes. We also performed an initial characterization of three previously undescribed radiosensitive mutants inactivated for loci *DR0007*, *DR0265* and *DR2462*.

## Results and Discussion

### Construction of a Tn5-based transposon mutant library in *D. radiodurans*

To generate a collection of mutants in *D. radiodurans*, we have developed an *in vivo* Tn5-based mutagenesis system. For this purpose, we cloned a mini-Tn5 derived (Tn5-*hph*) transposable element and a mutant *tnp* gene encoding a hyperactive Tn5 transposase [26] into a conditionally replicating temperature-sensitive shuttle vector (*repUTs*), that was shown previously to be stably maintained at 28°C in *D. radiodurans* and rapidly lost at 37°C [24] (plasmid p13554, Fig 1A). The Tn5-*hph* mini-transposon was constructed by assembling *in vitro* a cassette conferring hygromycin resistance and two flanking optimized 19-bp transposase recognition sequences (Mosaic Ends; [28]) (see [Material and Methods](#) for details of the construction). The *tnp* gene encoding the transposase was placed under the control of the  $P_{spac}$  promoter [31] and cloned outside the mobile element to obtain stable insertions upon the loss of the delivery vector.

The mutant library was constructed in a *D. radiodurans* host (GY10973) expressing the LacI repressor to repress expression of the transposase from the  $P_{spac}$  promoter and avoid possible toxic effects previously reported in *E. coli* [32,33]. The isolation of Tn5 insertion mutants was performed in two steps: (i) the host strain was transformed with the transposase delivery vector and the transformants were selected at a permissive temperature (30°C) on TGY1X plates supplemented with both hygromycin and spectinomycin. (ii) Transformed cells were cultivated into TGY2X medium at 30°C to an  $A_{650} \approx 0.1$  (transposition step) and appropriate dilutions were plated on hygromycin plates at the non-permissive temperature (37°C) to simultaneously select for Tn5-*hph* insertion mutants and to cure the delivery vector (see [Materials and Methods](#) for details). The transposition frequency is about  $1 \times 10^{-2}$  (insertion mutants/viable cell), which is about 10-fold higher than observed in other bacterial species when using the Tn5 hyperactive transposase [29,30,34], thus demonstrating the efficiency of our method.

To test whether Tn5-*hph* insertions occurred randomly into the *D. radiodurans* genome, the insertion sites for a sample of 42 hygromycin-resistant mutants isolated at 37°C were localized by an arbitrary PCR procedure followed by DNA sequencing (see [Materials and Methods](#)). We found that each Tn5-*hph* insertion mapped to a unique location (data not shown), indicating that the insertion mutants of our library were independent and that the insertions occurred randomly throughout the genome of *D. radiodurans*.

### Large-scale isolation of ionizing radiation sensitive mutants

A total of 6207 Hyg<sup>R</sup> single-gene insertion mutants were screened for sensitivity to genotoxic agents such as  $\gamma$ -rays, UV-rays, and MMC according to the flow chart depicted in Fig 1B. The procedure included purification steps (steps 2 and 5 in Fig 1B) followed by two consecutive screening steps, replica plating and semi-quantitative spot test (steps 3 and 4, Fig 1B). Due to the multi-genomic status of *D. radiodurans* (4 to 8 genomic copies per cell according to [35]), the purification steps are important to favour homogenization of the mutated alleles. Mutants that appeared sensitive to at least one DNA damaging treatment after the screening steps were further analyzed by backcross assays (introduction of the insertion into the parental reference strain R1) to confirm the link between the mini-Tn5 insertion and their respective phenotype (steps 5 and 6, Fig 1B). A cohort of 206 mutants was mapped by arbitrary PCR followed by sequencing and analyzed for their homozygous/heterozygous status by diagnostic PCR (step 7, Fig 1B). Master screening data of backcrossed insertion mutants are given in S1 Table.

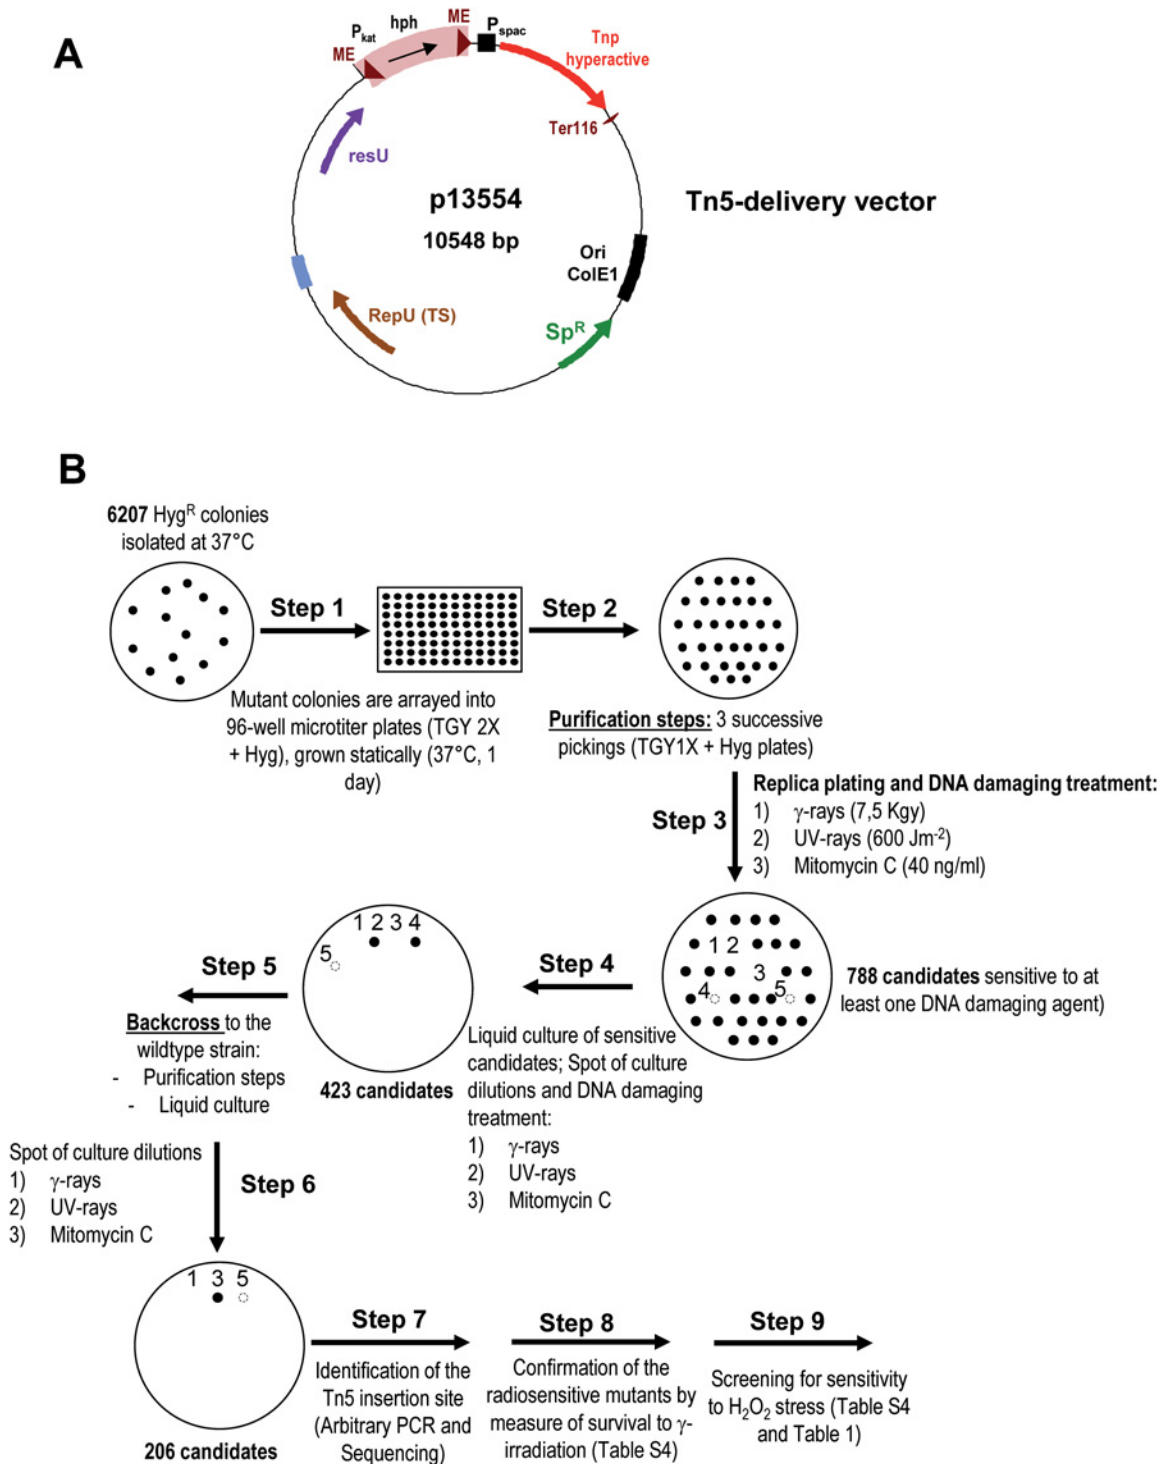

**Fig 1. Description of the transposon delivery procedure used to create the *D. radiodurans* Tn5-insertion mutant library.** (A) The Tn5-based transposon delivery vector, p13554 is a derivative of the temperature sensitive plasmid p13841 [24]. The mini Tn5 (Tn5-*hph*) consists of a hygromycin resistance cassette (*hph*) as a selectable marker, flanked by the optimized 19-bp mosaic ends (ME) of Tn5 [28]. The *hph* gene is expressed under the control of the P<sub>kat</sub> promoter. The hyperactive Tn5 transposase [25,26,94] is cloned outside the mobile element to generate stable insertions and is expressed from the P<sub>spac</sub> promoter inducible with IPTG [31]. Ter116 is a *D. radiodurans* transcription terminator. (B) Flow chart of the procedure used to screen the *D. radiodurans* Tn5-insertion mutant library for sensitivity to DNA damaging agents.

doi:10.1371/journal.pone.0124358.g001

As shown in [S1 Table](#), the insertions mapped largely within the coding region of genes except rare events for which the transposon was inserted in intergenic regions. Most of the insertions were found at only one position in a given gene, whereas for around 17% of the mutants, single insertions were found independently at different sites into the same gene ([S1 Table](#)). Except the mutants inactivated for *DR0400* and *DRB0002* that were found sensitive to only MMC, the majority of mutants were sensitive to ionizing radiation (IR) and many showed cross-sensitivity to MMC and/or UV. About half of the mutants were heterozygous. These include mutants with insertions in genes involved in essential processes such as DNA replication (*dnaE*, *dnaN*, *holA*), DNA supercoiling (*topA*, *gyrB*), translation and ribosome biogenesis or assembly. Interestingly, the mutant disrupted for *DR2606* encoding the homolog of PriA, a key protein of the main pathway for reactivation of stalled replication fork in bacteria [[36,37](#)], is sensitive to  $\gamma$ -, UV-radiation, and MMC. This result suggests the existence of a PriA-dependent replication restart primosome in *D. radiodurans* involved in the restoration of an intact genome after irradiation. A classification of the inactivated genes in accordance with the Cluster of Orthologous Groups (COG) data base ([S1 Fig](#)) shows that the mutants affected for functions involved in DNA replication, recombination and repair represented only a fraction (8.2%) of the total number of mutants. Indeed, the great majority of mutants were affected in various metabolic pathways including energy, coenzyme, amino acid, nucleotide and lipid metabolism, cell envelope biogenesis, and posttranslational modification ([S1 Fig](#) and [S1 Table](#)).

To evaluate more precisely the contribution of these genes to radioresistance, we measured the survival of each insertion mutant exposed to  $\gamma$ -rays at high doses of 10 and 15 kGy since sensitivity of repair genes mutants (as *i.e.* *radA*, *polX*, *sbcCD*) become apparent only in heavily irradiated cells (for review, see [[2](#)]). As shown in [S1 Table](#), the majority of the mutants were only marginally sensitive with less than a log decline in survival after exposure to 15 kGy. Only 37 insertion mutants showed a significant decline in their survival rate (survival rate lower than 6% when exposed to a dose of 15 kGy) as compared to the wild-type strain ([Table 1](#)). This result might be partly explained by the different physiological conditions between the screening procedure and the survival assay, which were performed by spot test on TGY plates and in liquid, respectively. The subset of the most radiation sensitive mutants ([Table 1](#)) highlights genes involved in diverse DNA repair pathways such as nucleotide excision repair (*uvrA-1*, *uvrB*, and *uvrC*) with a survival rate lower than 1% at 15 kGy, and recombinational repair (*recG*, *recN*, and *ruvA*), all being also sensitive to MMC and at a lesser extent to UV. We also identified *DRA0346* encoding PprA required for accurate cell division following repair of DNA DSB [[38–40](#)].

The presence of genes involved in DNA repair and stress response regulation among the genes listed in [Table 1](#) was expected. However, several genes, such as the *recA*, *recO* and *recR* genes involved in DNA double strand break repair by ESDSA and homologous recombination [[41](#)], or more generally known for their involvement in radioresistance, were not found by our screening procedure. Previous work showed that a limited number of RecA molecules (2500 molecules per cell in place of 44000 RecA molecules per cell in the wild type) were sufficient to ensure the same survival as those of the wild type bacteria upon  $\gamma$ -irradiation [[42](#)]. Interestingly, we found a slightly radiosensitive *recF* mutant in our screening on plates and we showed that mutation was not homogenotized. The purification steps on selective medium to favor homogenotization of the insertion mutations were not sufficient to obtain homogenotes when the mutations conferred an important selective disadvantage ([S1 Table](#)). We verified by PCR the homogenotization status of the mutants and 100 over 206 were found heterozygous, some of them being essential genes involved in DNA replication, DNA supercoiling, translation or metabolism (see [S1 Table](#)). Our screening also did not uncover the non-essential *ddrA* and *ddrB* genes, known to be involved in protection of 3' single-stranded DNA ends and in DNA



**Table 1. Genes detected in our screen for which the corresponding Tn5 insertion mutants exhibit the highest gamma radiation sensitive phenotype.**

| Functional category                                    | Mutant locus                  | survival to γ-rays (%)     |                            | Sensitivity to   |                 |                                            | Comments                         |
|--------------------------------------------------------|-------------------------------|----------------------------|----------------------------|------------------|-----------------|--------------------------------------------|----------------------------------|
|                                                        |                               | 10 kGy                     | 15 kGy                     | MMC <sup>a</sup> | UV <sup>b</sup> | H <sub>2</sub> O <sub>2</sub> <sup>c</sup> |                                  |
| <b>CONTROL STRAINS</b>                                 |                               |                            |                            |                  |                 |                                            |                                  |
| wild-type control                                      |                               | <b>85</b>                  | <b>38</b>                  | R                | R               | R                                          |                                  |
| <i>ΔrecA</i>                                           |                               | <b>&lt;10<sup>-5</sup></b> | <b>&lt;10<sup>-5</sup></b> | SS               | SS              |                                            |                                  |
| <i>ΔddrB</i>                                           |                               | <b>1</b>                   | <b>0.1</b>                 | S                | S               |                                            |                                  |
| <i>ΔpolX</i>                                           |                               | <b>50</b>                  | <b>5</b>                   | s                | s               |                                            |                                  |
| <i>katA::Tn5</i>                                       |                               | <b>48</b>                  | <b>15.5</b>                | R                | R               | SS                                         |                                  |
| <b>DNA replication, recombination, and repair</b>      |                               |                            |                            |                  |                 |                                            |                                  |
| <i>Nucleotide excision repair</i>                      |                               |                            |                            |                  |                 |                                            |                                  |
| UvrA1                                                  | <i>DR1771</i>                 | 5.7                        | 0.3                        | SS               | s               | s                                          | <b>heterogenote</b>              |
| UvrB                                                   | <i>DR2275</i>                 | 6.2                        | 0.7                        | SS               | R               | R                                          |                                  |
| UvrC                                                   | <i>DR1354</i>                 | 5.0                        | 0.03                       | S                | s               | R                                          |                                  |
| <i>Homologous recombination</i>                        |                               |                            |                            |                  |                 |                                            |                                  |
| RecG                                                   | <i>DR1916</i>                 | 23.0                       | 4.1                        | SS               | S               | R                                          |                                  |
| RecN                                                   | <i>DR1477</i>                 | 28.9                       | 5.5                        | SS               | S               | R                                          |                                  |
| RuvA                                                   | <i>DR1274</i>                 | 18.8                       | 5.4                        | SS               | SS              | s                                          | <b>heterogenote</b>              |
| <i>Other mechanisms</i>                                |                               |                            |                            |                  |                 |                                            |                                  |
| DNA topoisomerase I                                    | <i>DR1374</i>                 | 12.8                       | 1.9                        | s                | s               | R                                          | <b>heterogenote</b>              |
| PprA                                                   | <i>DRA0346</i>                | 0.4                        | 0.1                        | SS               | SS              | R                                          |                                  |
| PriA                                                   | <i>DR2606</i>                 | 85                         | 4.2                        | SS               | S               | R                                          |                                  |
| <b>Stress response and other regulatory functions</b>  |                               |                            |                            |                  |                 |                                            |                                  |
| <i>Radiation resistance</i>                            |                               |                            |                            |                  |                 |                                            |                                  |
| Global regulator IrrE                                  | <i>DR0167</i>                 | 1                          | 0.01                       | SS               | SS              | S                                          |                                  |
| Response regulator DrRRA                               | <i>DR2418</i>                 | 32                         | 1.5                        | SS               | R               | R                                          |                                  |
| DNA-damage responsive membrane protein                 | <i>DR2518</i>                 | 26.3                       | 6                          | SS               | SS              | s                                          |                                  |
| <i>Putative transcription factors</i>                  |                               |                            |                            |                  |                 |                                            |                                  |
| HTH transcriptional regulator, GntR family (COG2188)   | <i>DR0265</i>                 | 19.3                       | 0.6                        | S                | S               | S                                          |                                  |
| HTH transcription factor, CAP family DdrI              | <i>DR0997</i>                 | 4.7                        | 0.4                        | SS               | SS              | s                                          | <b>heterogenote</b>              |
| <b>Translation, ribosomal structure and biogenesis</b> |                               |                            |                            |                  |                 |                                            |                                  |
| 30S ribosomal protein S19, RpsS                        | <i>DR0315</i>                 | 39.2                       | 2.7                        | R                | s               | s                                          | <b>heterogenote</b>              |
| Ribonuclease P protein component (RnpA)                | <i>DR2151</i>                 | 45.4                       | 0.3                        | R                | R               | R                                          |                                  |
| Alanyl tRNA synthetase, AlaS                           | <i>DR2300</i>                 | 23.2                       | 2.7                        | s                | s               | s                                          | <b>heterogenote</b>              |
| <b>Metabolic pathways</b>                              |                               |                            |                            |                  |                 |                                            |                                  |
| <i>Energy production and conversion</i>                |                               |                            |                            |                  |                 |                                            |                                  |
| Rieske like Fe-S protein (COG0723)                     | <i>DR0342</i>                 | 51.2                       | 4.6                        | s                | s               | R                                          |                                  |
| Cytochrome C-Type biogenesis protein CycJ              | <sup>(u)</sup> <i>DR0347</i>  | 4.5                        | 1.2                        | R                | R               | R                                          |                                  |
| Aromatic compound dioxygenase, ferredoxin (COG2146)    | <i>DR1950</i>                 | 24.5                       | 0.6                        | S                | R               | R                                          | <b>heterogenote</b>              |
| Cytochrome C oxidase subunit III, CyoB                 | <i>DR2620</i>                 | 39.1                       | 5.3                        | R                | R               | NA <sup>d</sup>                            | <b>heterogenotegrowth defect</b> |
| Malic enzyme                                           | <sup>(o)</sup> <i>DRA0276</i> | 39.4                       | 4.2                        | R                | R               | R                                          |                                  |
| <i>Carbohydrate metabolism</i>                         |                               |                            |                            |                  |                 |                                            |                                  |
| Fructokinase RbsK ortholog                             | <i>DR1525</i>                 | 48.7                       | 3.4                        | SS               | S               | s                                          |                                  |
| <i>Amino acid transport and metabolism</i>             |                               |                            |                            |                  |                 |                                            |                                  |
| Glycine/serine hydroxymethyltransferase (GlyA)         | <i>DR0038</i>                 | 41                         | 2.1                        | s                | s               | R                                          |                                  |

(Continued)

Table 1. (Continued)

| Functional category                                                       | Mutant locus              | survival to γ-rays (%) |        | Sensitivity to   |                 |                                            | Comments                  |
|---------------------------------------------------------------------------|---------------------------|------------------------|--------|------------------|-----------------|--------------------------------------------|---------------------------|
|                                                                           |                           | 10 kGy                 | 15 kGy | MMC <sup>a</sup> | UV <sup>b</sup> | H <sub>2</sub> O <sub>2</sub> <sup>c</sup> |                           |
| <i>Metabolism of coenzymes, cofactors and vitamins</i>                    |                           |                        |        |                  |                 |                                            |                           |
| Pantothenate synthetase, PanC                                             | DR1164                    | 51.6                   | 4.1    | S                | S               | R                                          |                           |
| ApbE family protein (involved in thiamine biosynthesis)                   | DR1794                    | 42.4                   | 5.6    | R                | R               | R                                          | heterogenote              |
| Ketopantoate hydroxymethyl transferase                                    | DR2615                    | 44.5                   | 4.3    | SS               | S               | R                                          |                           |
| <i>Membrane transport</i>                                                 |                           |                        |        |                  |                 |                                            |                           |
| Signal peptidase I (COG0681)                                              | DR1321                    | 42.6                   | 4.6    | S                | S               | R                                          |                           |
| NRAMP family membrane transporter                                         | DR1709                    | 28.8                   | 4.6    | R                | s               | R                                          | heterogenote              |
| <b>Poorly characterized or uncharacterized proteins</b>                   |                           |                        |        |                  |                 |                                            |                           |
| Uncharacterized conserved protein (COG1624)                               | DR0007                    | 10.1                   | 0.5    | SS               | s               | R                                          |                           |
| Small nucleotidyltransferase- like protein (COG1669)                      | DR0679                    | 28.3                   | 1.4    | s                | s               | S                                          |                           |
| Exopolyphosphatase-related protein (COG0618) or DHH superfamily hydrolase | DR0826                    | 33.1                   | 2.5    | SS               | s               | s                                          |                           |
| Protein containing an N-terminal CDNR domain                              | DR1740                    | 38.5                   | 5.5    | R                | R               | NA <sup>d</sup>                            | heterogenotegrowth defect |
| Uncharacterized secreted protein                                          | DR2058                    | 51.9                   | 4.6    | R                | R               | R                                          |                           |
| RNase Y family                                                            | DR2462                    | 30.1                   | 0.9    | S                | SS              | R                                          |                           |
| Predicted membrane protein                                                | DR2572                    | 38.9                   | 3.4    | R                | s               | R                                          |                           |
| Uncharacterized conserved secreted enzyme                                 | DRA0022                   | 40.5                   | 4.8    | R                | R               | R                                          | heterogenote              |
| intergenic insertion                                                      | between DR0251 and DR0252 | 24.2                   | 0.1    | R                | R               | R                                          |                           |
| intergenic insertion                                                      | between DR2613 and DR2614 | 33.2                   | 5.3    | R                | R               | R                                          |                           |

<sup>a</sup>, <sup>b</sup>SS, highly sensitive, survival <10<sup>-6</sup>; S, sensitive, survival comprised between 10<sup>-6</sup> and 10<sup>-4</sup>; s, slightly sensitive, survival comprised between 10<sup>-4</sup> and 10<sup>-2</sup>; R, resistant, survival >10<sup>-2</sup>.

<sup>a</sup> onto TGY plates supplemented with 40 ng/mL mitomycin C (see [Materials and Methods](#)).

<sup>b</sup> onto TGY plates exposed to 600 J m<sup>-2</sup> UV-rays (see [Materials and Methods](#)).

<sup>c</sup> by using the disc inhibition assay as described in [Materials and Methods](#) and [Fig 2](#) (for the inhibition diameters corresponding to the different levels of sensitivity).

<sup>d</sup> NA: Not applicable because of growth defect.

<sup>(o)</sup> gene is located in a putative operon (predicted by FGENESB ([www.softberry.com](http://www.softberry.com))).

<sup>(u)</sup> transposon inserted in the upstream region of the corresponding CDS.

doi:10.1371/journal.pone.0124358.t001

DSB repair by single-strand annealing, respectively. Given that 14957 independent mutants are required to obtain a 99% chance of inactivating a particular gene in *D. radiodurans* ([43] and see [Material and Methods](#)), we did not expect to identify all the genes involved in radioresistance. Indeed, we can estimate that approximately 14% of the genes were not inactivated among the 6207 insertion mutants we screened (see [Material and Methods](#) for calculation details).

Our screening also highlights genes previously reported as key players in the regulation of the radiation/dessication response of *D. radiodurans* such as: (i) *irrE* encoding the positive regulator of the DNA damage response [15–17,44]; (ii) *DR2418* encoding DrRRA, the response regulator of a two-component system responsible for transcriptional regulation of numerous genes related to stress response and DNA repair [45]; (iii) *DR2518* encoding a DNA damage-inducible membrane protein kinase important for DNA DSB repair [46,47]. In addition, we

also isolated the heterozygous insertion mutant *ddrI* (*DR0997*), a DNA damage response gene encoding a transcription factor of the CAP family whose relative expression was shown to be significantly reduced in the *drRRA* mutant under both normal conditions and  $\gamma$ -radiation stress [45].

The main category of radiation sensitive mutants isolated in this study affects various metabolic functions. These results agree with recent data indicating that metabolic reprogramming plays a central role in the survival of organisms exposed to oxidative stress [48]. Mn ions play a major role in protecting proteins from oxidative damage as component of non-enzymatic metabolite complexes [49]. In accordance with the importance of a high Mn/Fe ratio for efficient recovery from irradiation injury, we isolated two mutants likely impaired in this ratio: (1) one heterozygous mutant for the gene *DR1709*, encoding a NRAMP family Mn(II) transporter [14], in which the intracellular concentration of Mn<sup>2+</sup> might be lower than in wild type (2) the second mutant was inactivated for *DR2106* encoding SufB (S1 Table), a member of the SUF system involved in both assembly and repair of oxidized oxygen-labile Fe-S clusters [50]; for a review, see [51]. Thus, alteration of SufB activity may increase intracellular free iron, promoting oxidative damage through the Fenton reaction [9,52]. SufB was also shown upregulated in *D. geothermalis* aerobically cultivated in low-Mn medium [53]. Likewise, inactivation of *DR1321* encoding signal peptidase I protein might affect the release of exogenous amino acids and peptides. These products are important to protect cellular proteins against oxidative damage as components of manganese complexes and/or membrane proteins required for metabolite transport or cell wall integrity [49]. Disruption of gene *DRA0276*, encoding the malic enzyme that converts malate to oxaloacetate in the glyoxylate bypass and TCA cycle, might also contribute to lower the *D. radiodurans* capacity to deal with ROS generated by  $\gamma$ -irradiation. The malic enzyme has been shown to be involved in the NADH-to-NADPH conversion cycle used by *Pseudomonas fluorescens* to counteract oxidative stress [48].

A significant number of radiosensitive mutants were inactivated for genes involved in various metabolic functions such as energy production and conversion, amino acid transport and metabolism of coenzymes and cofactors (Table 1). In particular, inactivation of *DR0342*, *DR0347*, *DR1950*, *DR2620* genes will greatly impair electron transfer through the respiratory chain as well as the associated ATP production. A failure to respond to the increased demand of energy during cell recovery could explain the IR sensitivity of these mutants. Likewise, protein synthesis which is essential for cell survival after irradiation [54] might be disturbed in another class of IR sensitive mutants such as *DR0315*, *DR2151*, and *DR2300* affected in translation activity.

Given the  $\gamma$ -radiation-induced production of intracellular ROS, we assessed whether the observed radiosensitive phenotype was primarily due to ROS sensitivity or not, by testing 158 mutants for their sensitivity to hydrogen peroxide stress (Table 1 and S1 Table) as described in Material and Methods and Fig 2. The few mutants found sensitive to oxidative stress fall into two categories: (i) the expected one, including the *katA* mutant (Table 1 and Fig 2; [55,56]), the *irrE* mutant, previously shown to exhibit significantly reduced catalase activities [57], and the mutant inactivated for *DR2518* encoding a DNA-damage sensor kinase (RqkA) involved in DNA repair and whose kinase activity is stimulated *in vitro* by the antioxidant pyrroloquinoline-quinone (PQQ) [46] (ii) the previously undescribed mutants including regulatory mutants inactivated for the transcription factors *DR0265* (Fig 2) and *DdrI* (Table 1), and mutant for *DR0679*, encoding a putative small nucleotidyltransferase (Table 1). In addition, several less  $\gamma$ -rays sensitive mutants were found sensitive to hydrogen peroxide. These include the *DR1131* mutant, inactivated for the *hemZ* gene involved in heme biosynthesis, the mutant for *DR1207* of unknown function, the *DR2374* mutant, inactivated for a ribonucleotide reductase of archeal type, and the mutant for *DR2417m*, encoding DncA, a novel essential  $\beta$ -CASP family nuclease



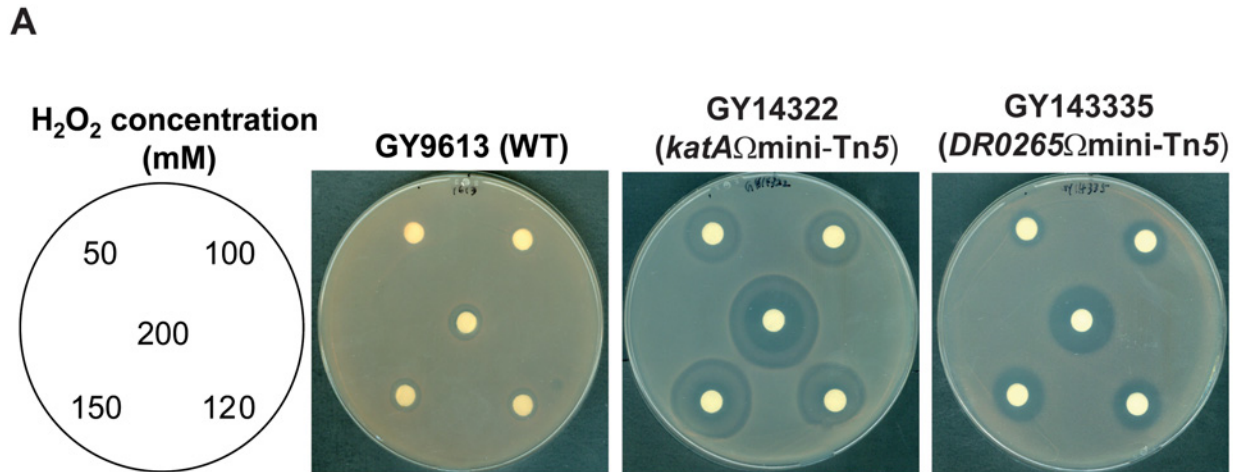

**B**

Categories of mutants depending on the size of diameter of growth inhibition zone (mm)

| Class                  | H <sub>2</sub> O <sub>2</sub> concentration (mM) |               |               |             |               |
|------------------------|--------------------------------------------------|---------------|---------------|-------------|---------------|
|                        | 50                                               | 100           | 120           | 150         | 200           |
| Resistant              | ≤6                                               | ≤10           | ≤11           | ≤12         | ≤14           |
| highly sensitive (SS)  | ≥16                                              | ≥17           | ≥20           | ≥24         | ≥27           |
| sensitive (S)          | >9 and <16                                       | >13.5 and <17 | >15.5 and <20 | >18 and <24 | >20.5 and <27 |
| slightly sensitive (s) | >7 and ≤9                                        | >10 and ≤13.5 | >11 and ≤20   | >12 and ≤18 | >14 and ≤20.5 |
| WT                     | ≤6                                               | 9             | 9             | 10          | 11            |
| <i>katA</i> Δmini-Tn 5 | 17                                               | 20            | 21            | 24          | 29            |

**Fig 2. Measurement of sensitivity to H<sub>2</sub>O<sub>2</sub> stress by disc inhibition assay (procedure described in Materials and Methods).** (A) Phenotype of the wild-type (resistant), the *katA* mutant (highly sensitive), and the *DR0265* mutant (middle sensitive) are shown. (B) The mutants are classified into four categories depending on the diameter (in mm) of growth inhibition area as indicated.

doi:10.1371/journal.pone.0124358.g002

contributing to the radiation resistance of *D. radiodurans* ([58] and S1 Table). The low fraction of oxidative stress mutants identified in our library may also be due to the non-viable status of the Tn5-insertions into the genes essential for oxidative stress recovery in response to high level of radiations.

This broad distribution of the inactivated genes among diverse functional categories confirms that multiple pathways participate to the extraordinary radiation resistance of *D. radiodurans*. In addition to known genes involved in repair of DNA damage or in regulation, we have identified new genes whose involvement in IR resistance was not previously reported or suspected. Inactivation of six of these genes, resulted in a highly  $\gamma$ -radiation sensitive phenotype (with a survival to  $\gamma$ -rays of <1% at 15 kGy; Table 1). Among these six genes, we targeted

the two putative *D. radiodurans* loci *DR0007* (encoding a di-adenylate cyclase homolog) and *DR2462* (encoding an RNase Y homolog), as well as *DR0265* (likely encoding a transcription factor of unknown function). A more complete functional characterization of knockout mutants of these three genes is described below.

### Cyclic di-AMP (c-di-AMP) contributes to radioresistance of *D. radiodurans*

One of the radiosensitive mutants previously undescribed was inactivated for the *DR0007* locus. This gene encodes a homolog of CdaA (37% amino acid identity with *Bacillus subtilis* YbbP, renamed CdaA), one of the three diadenylyl cyclase (DAC) enzymes found in *B. subtilis*, that catalyzes signalling nucleotide c-di-AMP synthesis [59]. The second gene, *DR0008* encodes a homolog of CdaR, which stimulates the diadenylyl cyclase activity of CdaA in *B. subtilis* [59]. Sequence analysis of this locus with FGENESB ([www.softberry.com](http://www.softberry.com); [60]) suggests that *DR0007*, *DR0008* and *DR0009* are within a predicted operon. Accordingly, these three genes showed highly significant correlation of their expression pattern, based on transcriptome analysis [20].

To confirm the importance of these proteins for *D. radiodurans* recovery after irradiation, several single and double deletion mutants were constructed. Homogenotes of the  $\Delta DR0007$  mutant were easily obtained on selective medium and did not display any growth defect under standard cultivation conditions (same doubling time as those of the wild type R1 strain), indicating that *DR0007* gene is not essential for cell viability under our culture conditions. The survival of  $\Delta DR0007$  was decreased by a factor of 7- and 21-fold after  $\gamma$ -irradiation at 15 and 20 kGy, respectively, when compared to the wild type strain. Ectopic expression of *DR0007* gene alone did not fully restore the wild type radiation resistance (Fig 3A). Although we did not find insertions in *DR0008* in our initial screening, we constructed a *DR0008* deletion mutant to completely inactivate the gene. The  $\Delta DR0008$  mutant displayed the same  $\gamma$ -radiation sensitive phenotype as the  $\Delta DR0007$  mutant, and again ectopic expression of *DR0008* did not restore the wild type phenotype (Fig 3A). The double mutant  $\Delta DR0007 \Delta DR0008$  showed the same survival rate than those of the single mutants (Fig 3A). In contrast, ectopic expression of both of these genes in the double mutant was sufficient to restore the wild type radiation resistance (Fig 3A). These results suggest that *DR0007* and *DR0008* are functionally linked and that a coordinated expression of the two genes is required to fulfill their role in radioresistance. To examine whether c-di-AMP could complement the radiosensitive phenotype of  $\Delta DR0007$  and  $\Delta DR0008$ , exogenous c-di-AMP was added immediately after exposure to  $\gamma$ -radiation, in the presence of polyamines to favor c-di-AMP uptake according to the procedure of Oppenheimer-Shaanan *et al.* [61]. Nevertheless, addition of c-di-AMP did not restore radiation resistance in the single and double mutants. This may be due to the use of polyamines which decrease cell survival even in the wild type (by a factor of 3.5 at 10 kGy and 4 at 15 kGy). Finally, deletion of *DR0007*, *DR0008* or both only slightly sensitizes the cells to MMC (Fig 4A) and to UV light (Fig 5A). Deletion of *DR0009* gene did not affect resistance to  $\gamma$ -irradiation, but we cannot exclude that *DR0025* that shares 35% identity and 53% similarity with *DR0009* may functionally complement the deletion of *DR0009*. This putative redundancy of function may explain why we did not find insertion mutants inactivated for *DR0009* in our initial screening.

To determine whether the increased sensitivity to ionizing radiation of the  $\Delta DR0007$  mutant was due to an altered DNA repair capacity after irradiation, we measured by pulse-field gel electrophoresis the kinetics of DNA DSB repair in the  $\Delta DR0007$  mutant exposed to 3.8 kGy  $\gamma$ -irradiation. The  $\Delta DR0007$  mutant reassembles an intact genome as fast as the wild type strain

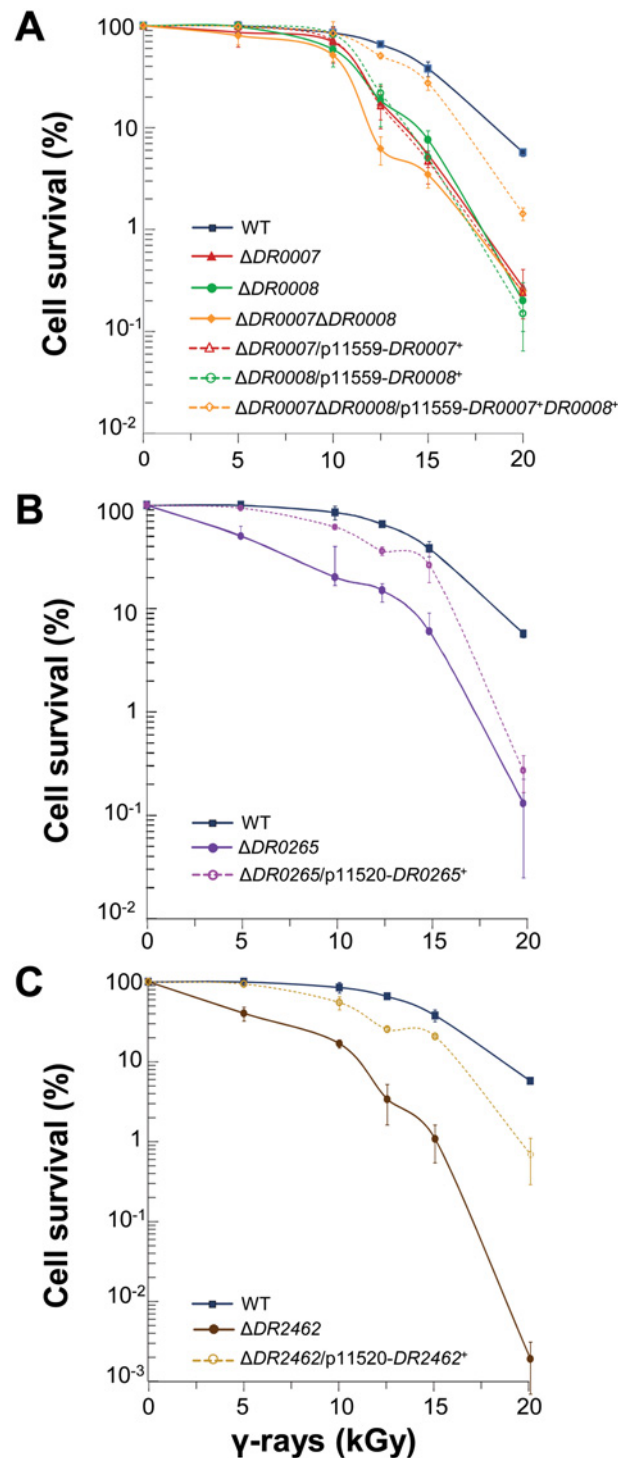

**Fig 3. The *D. radiodurans* mutants deleted for *DR0007*, *DR0008* or both (A), *DR0265* (B) and *DR2462* (C) show increased sensitivity to  $\gamma$ -irradiation.** Bacteria were exposed to  $\gamma$ -irradiation at doses indicated on the abscissa. Symbols: (A) wild-type (blue squares),  $\Delta DR0007$  (red closed triangles),  $\Delta DR0008$  (green closed circles),  $\Delta DR0007\Delta DR0008$  (yellow closed diamonds),  $\Delta DR0007/p11559-DR0007^+$  (red open triangles),  $\Delta DR0008/p11559-DR0008^+$  (green open circles),  $\Delta DR0007\Delta DR0008/p11559-DR0007^+DR0008^+$  (yellow open diamonds). (B) wild-type (blue squares),  $\Delta DR0265$  (purple closed triangles),  $\Delta DR0265/p11520-DR0265^+$  (pink open triangles). (C) wild-type (blue squares),  $\Delta DR2462$  (brown closed circles),  $\Delta DR2462/p11520-DR2462^+$  (ochre open circles).

doi:10.1371/journal.pone.0124358.g003

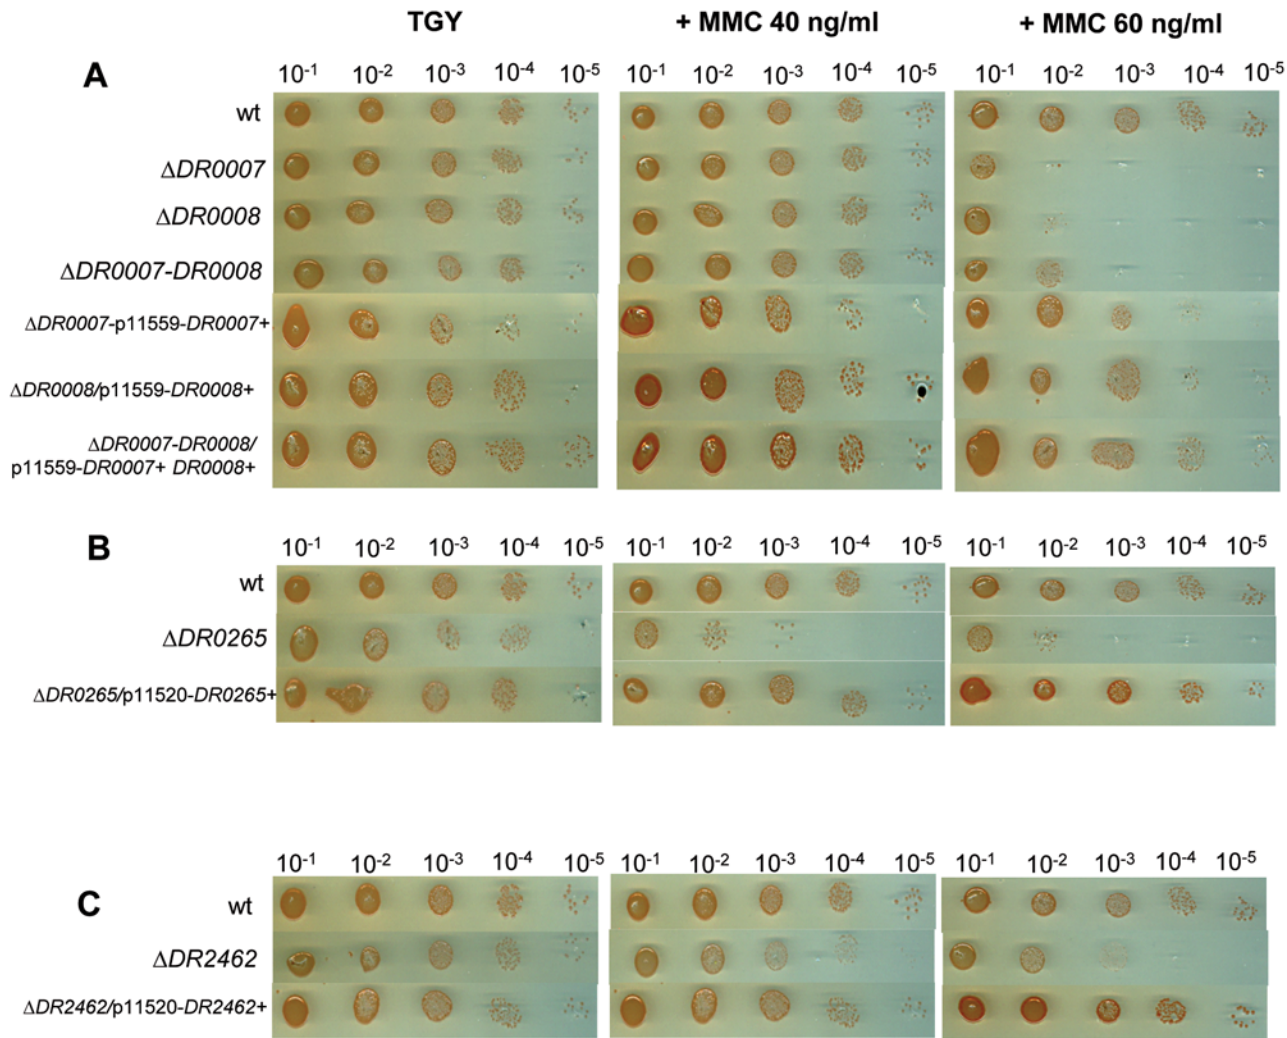

**Fig 4. Deletion of *DR0007*, *DR0008* or both (A), *DR0265* (B), or *DR2462* (C) sensitizes *D. radiodurans* to MMC.** Bacteria were grown in TGY2X liquid medium to  $A_{650} = 1$ , serially diluted and dilutions were spotted onto TGY agar plates supplemented or not with MMC at the indicated doses, and supplemented with spectinomycin for strains harboring derivatives of p1 1559 or p1 1520 plasmids.

doi:10.1371/journal.pone.0124358.g004

after exposure to  $\gamma$ -irradiation, indicating that its radiosensitivity is unrelated to a defect in DNA DSB repair.

Interestingly, identification, in our screening for radiosensitive mutants, of a putative c-di-AMP synthesizing enzyme, the DR0007 protein, and its potential positive regulator, the DR0008 protein suggests the contribution of c-di-AMP signalling in the extreme radiation resistance of *D. radiodurans*. c-di-AMP is a second messenger recently discovered in bacteria, and involved in the control of diverse cellular pathways (for reviews, see [62–64]) such as regulation of fatty acid synthesis [65], response to cell wall stress [66–68], regulation of potassium transport [63,69]. In addition, the common riboswitch class *ydaO* has been recently identified as receptors for c-di-AMP to control different biological processes [70]. As most of the bacterial species, *D. radiodurans* encodes a single DAC (diadenylate cyclase) domain-containing protein, the DR0007 product, while *B. subtilis* harbors three specialized c-di-AMP synthases: DisA (DNA Integrity Scanning protein) which is involved in coupling DNA integrity with progression of sporulation [61,71], CdaA and CdaS (which is sporulation-specific). In contrast to



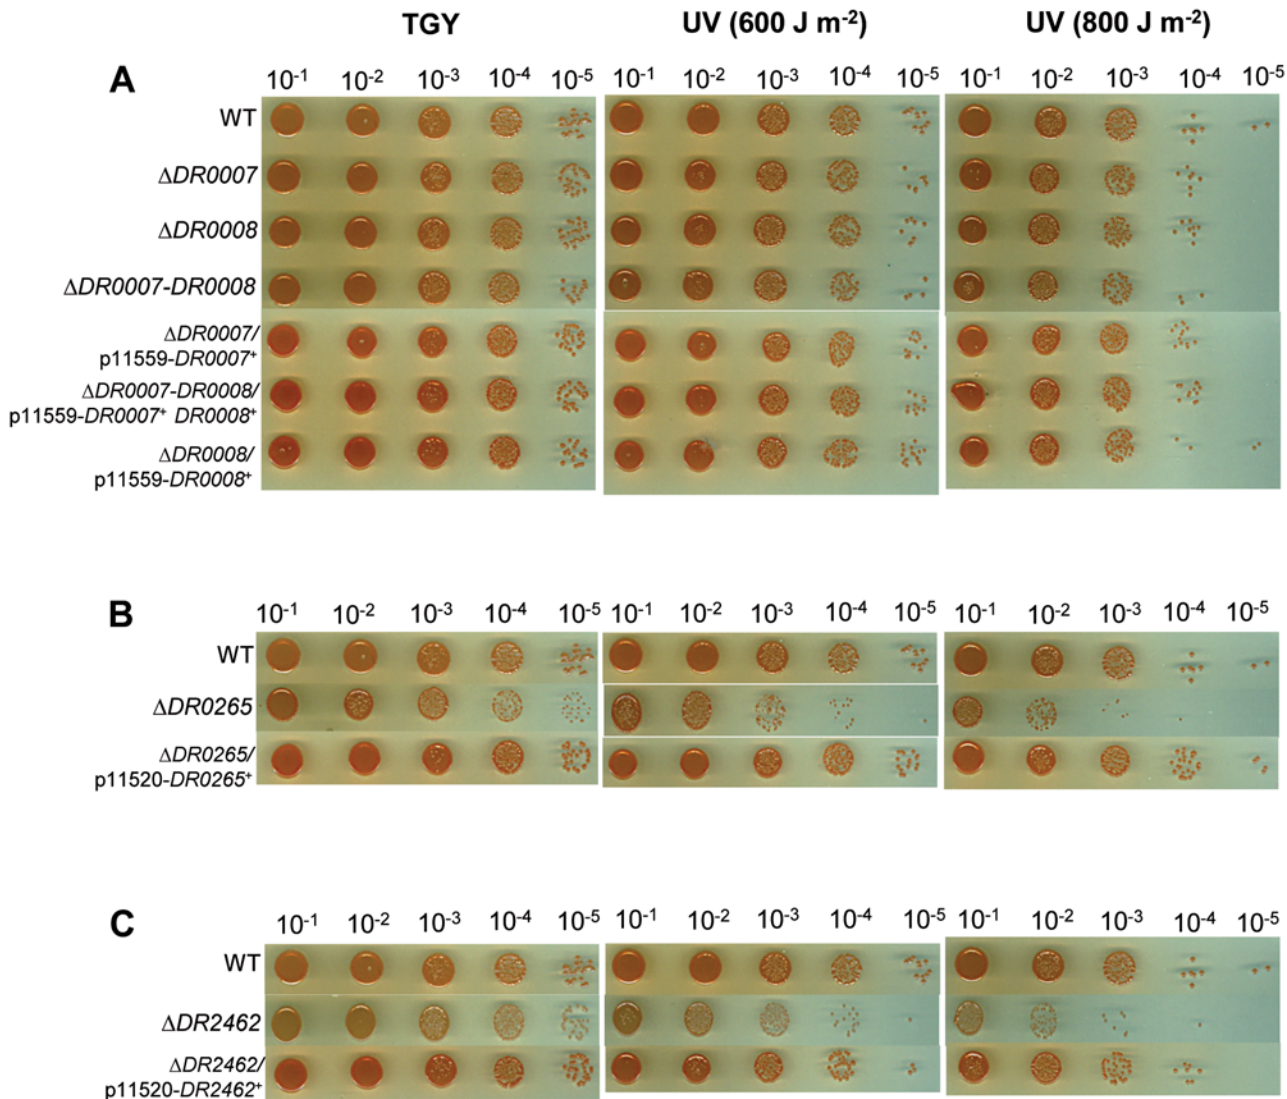

**Fig 5.  $\Delta DR0265$  and  $\Delta DR2462$  are sensitive to UV but not  $\Delta DR0007$  and  $\Delta DR0008$ .** Bacteria were grown in TGY2X liquid medium to  $A_{650} = 1$ , serially diluted and dilutions were spotted onto TGY agar plates subsequently exposed to UV-irradiation at the indicated doses.

doi:10.1371/journal.pone.0124358.g005

DisA, the DR0007 protein does not contain any DNA binding domain. Although we showed that both DR0007 and DR0008 proteins are required for radioresistance, the specific set of receptor and effector proteins of the c-di-AMP signaling system in *D. radiodurans* remain to be identified.

### Identification of a new transcription factor, DR0265 involved in extreme radioresistance of *D. radiodurans*

Our screen also identified a new radiosensitive mutant inactivated for DR0265, encoding a putative transcription factor belonging to the GntR family. This protein contains the C-terminal effector-binding domain UTRA (UbiC transcription Regulator Associated domain) of the HutC subfamily [72]. While the repertoire of HTH-containing proteins identified in *D. radiodurans* reflects the diversity of prokaryotic transcriptional regulators [73], only two members



of the HutC subfamily (*DR0265* and *DRA0211*) are encoded by *D. radiodurans* (versus 24 HutC-like regulators in *Streptomyces coelicolor*, 6 in *E. coli* and 7 in *B. subtilis*).

Compilation of palindromic *cis*-acting elements recognized by regulators of the GntR family has identified the sequence 5'GT-N(1)-TA-N(1)-AC 3' as the *cis*-element consensus for the HutC subfamily [72]. Members of this subfamily control various biological processes (antibiotic production, sensing of nutritional status, growth, proliferation and development). In *Pseudomonads*, *Klebsiella* and *Brucella*, HutC acts as a transcriptional repressor of the Hut system responsible for histidine utilization (for review, see [74]). In *D. radiodurans*, the Hut operon (*DRA0151–DRA0147*) is preceded by the RDRM sequence, and therefore may belong to the predicted radiation response regulon [14]. Nevertheless, it is unlikely that transcriptional regulation of the *hut* operon of *D. radiodurans* is mediated by a HutC-type factor for the following reasons: (i) the consensus sequences for HutC subfamily are not found upstream of the *D. radiodurans hut* operon. (ii) the organization of the *D. radiodurans hut* operon shows similarity to those of *Corynebacterium resistens* with an adjacent gene encoding a transcription regulator of the IclR family (*DRA0152*), and this IclR factor has been shown to activate the *hut* operon in *C. resistens* [75], suggesting a similar regulation of the Hut system in both organisms.

Deletion of *DR0265* sensitizes cells to  $\gamma$ -irradiation, as shown by the 7- and 44-fold decrease of  $\Delta DR0265$  survival at doses of 15 and 20 kGy, respectively, when compared to those of the wild type strain (Fig 3B). *Trans* expression of the *DR0265* gene under control of its own promoter restored the  $\gamma$ -ray resistance of the mutant strain to the wild type level (Fig 3B), confirming that the radiosensitivity of  $\Delta DR0265$  was solely due to the absence of the *DR0265* protein.  $\Delta DR0265$  bacteria were also sensitive to UV light (Fig 5B), but only slightly sensitive to MMC (Fig 4B). As previously observed with  $\Delta DR0007$ , the kinetics of DNA DSB repair of  $\Delta DR0265$  mutant shows no delay in restoration of intact genomic DNA after  $\gamma$ -irradiation compared to the wild type. Interestingly,  $\Delta DR0265$  bacteria were shown to be among the rare mutants found sensitive to hydrogen peroxide (Table 1, Fig 2), suggesting that *DR0265* may be involved in the response to ROS but the targets of this putative regulator remain to be discovered.

## Involvement of a putative RNase Y in *D. radiodurans* extreme radioresistance

Another gene identified as important for radioresistance, *DR2462*, encodes a homolog of the RNase Y recently discovered in *B. subtilis* [76–78], as a key endoribonuclease for mRNA turnover, with an important general role in synthesis of components involved in DNA replication, iron metabolism and the cell envelope and cell wall [79,80].

To confirm the role of the *DR2462* protein in the *D. radiodurans* radioresistance, we have constructed a  $\Delta DR2462$  mutant. Homogenotes of the  $\Delta DR2462$  mutant were easily obtained. Bacteria devoid of the *DR2462* protein were sensitive to  $\gamma$ -irradiation as shown by the strong decrease of their survival rate compared to those of the wild type (38-fold and 3021-fold decrease at 15 and 20 kGy, respectively) (Fig 3C). They were also moderately sensitive to UV light (Fig 5C) while they showed a wild type resistance to MMC (Fig 4C). To prove that the absence of the *DR2462* protein is solely responsible for the  $\gamma$ -ray sensitivity, the *DR2462* gene including its natural promoter and its putative transcription terminator was cloned into plasmid p11520 and the resulting plasmid p13563 was used to transform  $\Delta DR2462$  bacteria. The resulting transformants recovered the typical wild type survival following exposure to  $\gamma$ -rays, even at a massive dose of 20 KGy, confirming the requirement of *DR2462* for the radiation resistance (Fig 3C).

The kinetics of DNA DSB repair in the  $\Delta DR2462$  mutant exposed to 3.8 kGy  $\gamma$ -irradiation was measured by pulse-field gel electrophoresis. Cells devoid of *DR2462* protein showed a

delay shorter than one hour in the restoration of an intact genome after irradiation compared to the wild type bacteria (Fig 6B) but it seems that replication did not restart immediately after reconstitution of the genome (Fig 6B), a delay that was also observed for cell division restart (Fig 6A).

In *B. subtilis*, depletion of RNase Y (YmdA) resulted in an aberrant distribution of cell lengths, with a few unusually longer cells and many short, almost spherical, cells reminiscent of minicells [81,82]. It was proposed that this phenotype might be related to increased concentration of *dnaA* transcript [80], since overexpression of DnaA has been linked to aberrant changes in cell shape [83]. *D. radiodurans* mutant bacteria devoid of DR2462 protein grew normally and did not show dramatic alterations of their morphologies when they were observed by microscopy after nucleoid and membrane staining, except that they are slightly smaller than wild type cells (Fig 7), suggesting a more modest role of RNase Y in *D. radiodurans* cell viability than those played by RNase Y in *B. subtilis*.

## Conclusion

As indicated by [84], broad genetic screens to identify all processes contributing to radiation resistance are very difficult to perform in *Deinococcus*, due to its multi-genomic status. For these reasons, they decided to identify genes involved in radioresistance in an *E. coli* strain exhibiting levels of radiation resistance approaching that of *D. radiodurans* [85]. They used a Transposon Directed Insertion Sequencing (traDIS) strategy to locate the transposon insertion and to compare the frequency of each insertion within an un-treated population and a population subjected to repeated exposures to ionizing radiation. They identified 46 candidate genes that appear to have a significant role in survival after exposure to ionizing radiation [84]. Here, using a more classical strategy taking into account the multi-genomic status of *D. radiodurans*, we identified 37 genes and two intergenic sequences highlighting the importance of DNA repair, stress response, translation but also energy production, carbohydrate metabolism, membrane transport and poorly characterized or uncharacterized proteins in *Deinococcus* radioresistance. Among the 46 genes identified as involved in *E. coli* radioresistance by Byrne et al ([84]), we found 9 *D. radiodurans* homologs involved in DNA metabolism (*recN*, *recG*, *recR*, *recF*, *uvrA*, *uvrB*, *uvrC*, *topA*) or with uncharacterized functions (*DR1167* homolog of the *E. coli yabA*). We also found an insertion located in the intergenic region between *DR2614* and *DR2613* (the latter encoding a homolog of the *E. coli yab1* gene). Interestingly, we found the key genes involved in regulation of the DNA damage response, most being specific to the *Deinococcaceae*. We more extensively characterized three mutants not found in *E. coli* as contributing to radioresistance, impaired in a putative transcriptional regulator, a putative protein of the RNase Y family and a putative protein proposed to be involved in c-di-AMP synthesis, all being never described to date to participate to *Deinococcus* radioresistance. All the genes identified in *E. coli* [84] and, here in *D. radiodurans*, as participating to radioresistance reinforce the idea that a complex network involving efficient DNA repair, protein protection against oxidation, and tightly coordinated combination of diverse metabolic and regulatory pathways, is the key of bacterial radioresistance.

## Materials and Methods

### Bacterial strains, media and growth conditions

Bacterial strains are listed in S2 Table. *E. coli* strain DH5 $\alpha$  was the general cloning host and strain SCS110 was used to propagate plasmids prior to introduction into *D. radiodurans* via transformation [86]. To produce p13554 in *E. coli*, we used XL1Blue that expresses *lacI<sup>Q</sup>* on the F' plasmid to avoid the toxicity due to overproduction of Tn5 transposase as described

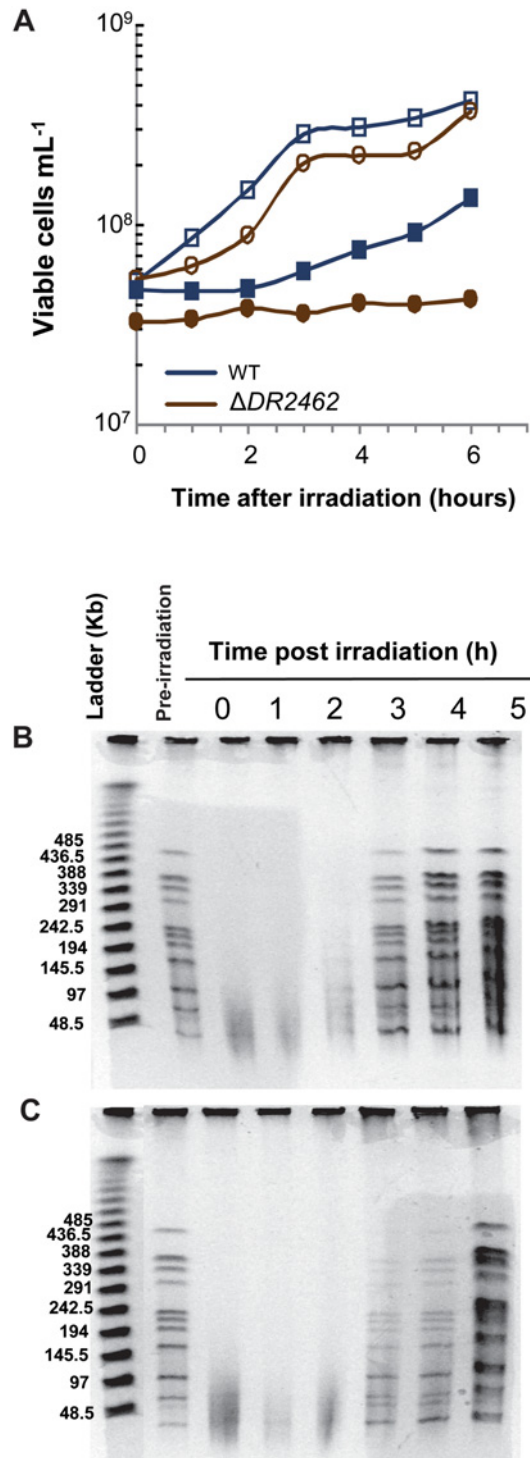

**Fig 6. The  $\Delta DR2462$  bacteria show an increased delay in cell division and in reconstitution of genomic DNA after  $\gamma$ -irradiation.** A. Growth delay after irradiation. Wild type (blue squares) and  $\Delta DR2462$  (brown circles) bacteria were exposed (filled symbols) or not (open symbols) to  $\gamma$ -irradiation at a dose of 3.8 kGy, diluted in TGY2X to an  $A_{650}$  of 0.3 and incubated at 30°C. At different times after irradiation, aliquots were taken to measure the number of viable cells per mL. B and C. Kinetics of restoration of genomic DNA. Bacteria were treated as in (A). DNA agarose plugs were prepared at the indicated post-irradiation times and digested with *NotI* prior to analyses by PFGE. B: wild type; C:  $\Delta DR2462$ .

doi:10.1371/journal.pone.0124358.g006

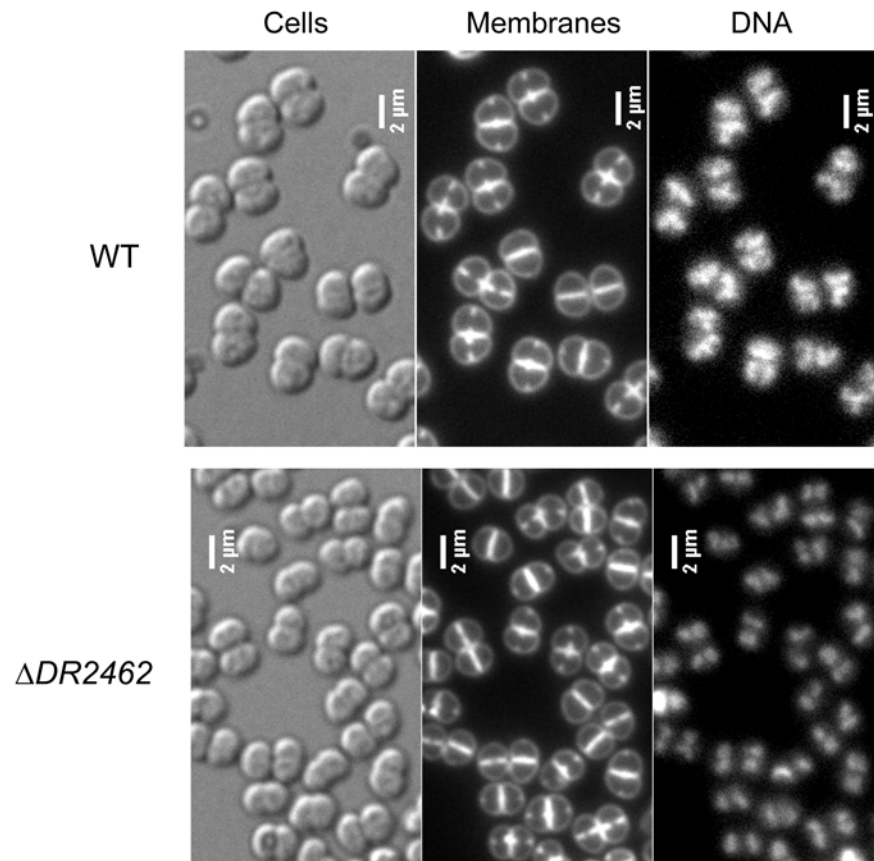

**Fig 7. Cell morphology in *D. radiodurans* deleted for *DR2462* observed by microscopy.** *D. radiodurans* cells from the wild type strain (top panels) and from  $\Delta DR2462$  strain (bottom panels) were grown to  $OD_{650} = 0.3$ . Left panels: Nomarski interference contrast (DIC). Middle panels: membrane staining (FM4-64). Right panels: DNA staining (DAPI). All pictures are at the same scale (bar = 2  $\mu m$ ).

doi:10.1371/journal.pone.0124358.g007

previously [32]. All *D. radiodurans* strains were derivatives of strain R1 ATCC 13939. TGY2X liquid medium and TGY plates [87] were used for *D. radiodurans* growth and Luria-Bertani (LB) broth for *E. coli*. Media were supplemented with the appropriate antibiotics used at the following concentrations: spectinomycin 40  $\mu g mL^{-1}$  for *E. coli* and 75  $\mu g mL^{-1}$  for *D. radiodurans*; hygromycin 50  $\mu g mL^{-1}$  for *E. coli* and 50 to 100  $\mu g mL^{-1}$  for *D. radiodurans*, kanamycin 25  $\mu g mL^{-1}$  for *E. coli* and 6  $\mu g mL^{-1}$  for *D. radiodurans*. When necessary, expression of Tn5 transposase was induced by adding 1 mM IPTG in media. Transformation of *D. radiodurans* with genomic DNA, PCR products, or plasmid DNA was performed as previously described [87].

### Construction of deletion mutants in *D. radiodurans*

To construct each mutant deleted for a given gene, the locus of interest was replaced with the appropriate antibiotic resistance cassette (either the  $Hyg^R$  resistance cassette expressed from the  $P_{kat}$  promoter or the  $Tet^R$  resistance cartridge expressed from the  $P_{groEL}$  promoter) using the tripartite ligation method [88]. The deletion mutants generated in this way and used in this study are:  $\Delta prA\Omega hph$  (for use as a control mutant in treatment with DNA damaging agents),  $\Delta DR0007\Omega hph$ ,  $\Delta DR0008\Omega hph$ , double mutant  $\Delta DR0007-DR0008\Omega hph$ ,  $\Delta DR0009\Omega hph$ ,  $\Delta DR0265\Omega hph$ ,  $\Delta oxyR\Omega hph$ ,  $\Delta oxyR2\Omega tetA$  (for using as control mutants in screening for

sensitivity to H<sub>2</sub>O<sub>2</sub>) and  $\Delta DR2462\Omega hph$ . The double mutant  $\Delta oxyR\Omega hph \Delta oxyR2\Omega tetA$  was constructed by transforming the  $\Delta oxyR2\Omega tetA$  single mutant with genomic DNA from the  $\Delta oxyR\Omega hph$  mutant. See [S3 Table](#) for oligonucleotides used for strain construction. The genetic structure and the purity of the resulting mutant strains were verified by PCR. Oligonucleotides used for diagnostic PCR and sequencing are available upon request.

## DNA manipulations

Plasmid DNA was extracted from *E. coli* using the NucleoSpin Plasmid miniprep kit (Macherey-Nagel). *D. radiodurans* chromosomal DNA was isolated as described previously [89]. PCR reactions were carried out with Phusion DNA Polymerase (Thermo Scientific) to amplify fragments subsequently used for cloning or with GoTaq Flexi DNA Polymerase (Promega) for all other applications. PCR products were purified using the NucleoSpin Gel and PCR Clean-up kit (Macherey-Nagel). To analyze the homozygous/heterozygous status of the mutants, diagnostic PCR were performed using appropriate pairs of primers encompassing the Tn5 insertion site. Oligonucleotides used for all these diagnostic PCR are available upon request.

## Construction of Tn5 delivery vector, p13554

The *lacI<sup>q</sup>* gene was amplified by PCR using primers ForLacI and RevLacIBg and the plasmid pTRC99A (Pharmacia, see also [S2 Table](#)) as template. The PCR fragment was digested by *Bgl*II, and ligated into the *Bam*HI site of p13841, resulting in the plasmid p13537 expressing *lacI<sup>q</sup>* in the reverse orientation to *P<sub>spac</sub>*. The *tnp* gene encoding the hyperactive Tn5 transposase was amplified by PCR with primers Tnp5UP and Tnp5Dra and plasmid pWH1891 ([90]; see also [S2 Table](#)) as template. After cleavage with *Nde*I and *Dra*I, the PCR fragment was ligated into plasmid p13537, generating plasmid p13545, expressing the transposase under the control of *P<sub>spac</sub>*. The mini-Tn5-Hyg<sup>R</sup> transposon was then amplified by PCR with primers MEUpBst and MEDnBgl and plasmid p12625 as template. After digestion with *Bst*1107I and *Bgl*II, the PCR fragment containing ME (mosaic ends derived from Tn5) was inserted into p13545 to generate plasmid p13547.

To use the Tn5-delivery system into *D. radiodurans* GY10973 strain expressing an additional chromosomal copy of *lacI* under the control of *P<sub>tufA</sub>* promoter, we have deleted *lacI<sup>q</sup>* from p13547 as follows: p13547 was digested with *Dra*I and *Psc*I and the 10531-bp fragment was ligated to a linker containing the *Dra*I and *Psc*I ends and an internal *Sal*I site, to generate plasmid p13554 (see [S3 Table](#) for oligonucleotides used for p13554 construction and [Fig 1](#)).

## Plasmids used for complementation analyses

Please see [S2](#) and [S3](#) Tables for details of construction of plasmids p14726, p14729, p14731, p14728, and p13567 (used for complementation analyses of mutants  $\Delta DR0007\Omega hph$ ,  $\Delta DR0008\Omega hph$ ,  $\Delta DR0007\Delta DR0008\Omega hph$  and  $\Delta DR0009\Omega hph$  respectively), p13564 (for complementation analyses of mutant  $\Delta DR0265\Omega hph$ ) and p13563 (for complementation analyses of mutant  $\Delta DR2462\Omega hph$ ).

## Mapping Tn5 insertions sites into *D. radiodurans* genome

Insertion mutants were mapped by the arbitrary-primed (AP)-PCR procedure [91,92], using GoTaq Flexi DNA polymerase (Promega). The first PCR round was performed in a final volume of 50  $\mu$ L with 1  $\mu$ L genomic DNA from single Hyg<sup>R</sup> colonies as template. The arbitrary primer (ARB1c) was paired either with a primer specific for the 5' end of the mini-Tn5 (Tn5-



212) or with a primer specific for the 3' end of the mini-Tn5 (Tn5-991), both at a final concentration of 0.8  $\mu\text{M}$  and PCR was performed as follows: 2 min 95°C, 6 cycles of 45 s 95°C, 45 s 30°C, 1 min 30 s 72°C; 30 cycles of 45 s 95°C, 45 s 45°C, 2 min 72°C; and finally 72°C for 5 min. The second round was performed in a final volume of 50  $\mu\text{L}$  with 5  $\mu\text{L}$  of the purified PCR product from round 1 as template. A second arbitrary primer (ARB3) was paired either with the Tn5-166 primer (5' end of Tn5) or with the Tn5-1055 primer (3' end of Tn5), each at a final concentration of 0.8  $\mu\text{M}$  and PCR was performed as follows: 2 min 95°C, 30 cycles (45 s 95°C, 45 s 52°C, 2 min 72°C); 72°C for 5 min. The products of this PCR were directly sequenced with the SeqRE primer (5' end of Tn5) or with the EB89 primer (3' end of Tn5) by Cogenics (Meylan, France). Oligonucleotides used are listed in [S3 Table](#).

### Procedure for *in vivo* transposition of mini-Tn5-*hph* into *D. radiodurans*

We have used the *D. radiodurans* GY10973 strain expressing a chromosomal copy of *lacI* under the control of the  $P_{tufA}$  promoter as a recipient, to ensure a non-toxic level of the transposase during the mutagenesis process. The isolation of Tn5 insertion mutants was performed in two steps as follows. First, the *D. radiodurans* GY10973 strain was transformed with the Tn5-*hph* delivery plasmid p13554 and transformants were selected at permissive temperature (30°C) on TGY agar supplemented with both hygromycin and spectinomycin. Ten independent Hyg<sup>R</sup> Spc<sup>R</sup> colonies were then pooled and resuspended into 200  $\mu\text{L}$  of TGY2X. 15  $\mu\text{L}$  of this resuspension was inoculated into 3 ml TGY2X supplemented with spectinomycin and incubated at 30°C with shaking to an  $A_{650} \sim 0.1$  (transposition step). This culture was finally serially diluted and plated onto both TGY agar without antibiotic to quantitate the viable cells and onto TGY agar supplemented with hygromycin and incubated at a non-permissive temperature (37°C) to simultaneously select for Tn5-*hph* insertion mutants and cure the delivery plasmid.

### Calculation of the number of predicted inactivated ORFs in the Tn5 insertion mutant library

Given that Tn5 insertion is random, the number of independent single-gene insertions in *D. radiodurans* required to inactivate 99% of the genes can be calculated using the following formula [43]:  $P = 1 - (1 - [x/g])^n$ , where  $P$  = probability of finding one transposon insertion within a given gene (0.99),  $x$  = average length of a *Deinococcal* gene (1011 bp),  $g$  = *D. radiodurans* genome size (3284156 bp), and  $n$  = number of independent insertion mutants. The number of genes inactivated among the 6207 insertion mutants analysed in our screening was estimated, based on Poisson's law:  $P(k) = (\lambda^k/k!)e^{-\lambda}$ , where  $k$  = number of insertions within a given gene and  $\lambda$  = the average number of insertions per gene. Given that the *D. radiodurans* genome encodes 3,195 predicted protein-encoding genes [73], one can estimate  $\lambda = 6,207/3,195 = 1.9427$  insertions per gene. Therefore, the probability of having no insertions within a given gene is  $P(0) = (\lambda^0/0!)e^{-\lambda} = e^{-\lambda} = 0.1433$ , indicating that approximately 14% of the genes were not inactivated among the 6207 mutants.

### Library screening for sensitivity to DNA damaging agents ( $\gamma$ , UV-irradiation and MMC treatment)

First, the Hyg<sup>R</sup> Spc<sup>S</sup> insertion mutants selected at non-permissive temperature (37°C) were homogenotized (for non-essential genes) as follows: the colonies were arrayed to 96-well microtiter plates containing 100  $\mu\text{L}$  of TGY2X broth supplemented with hygromycin (50  $\mu\text{g}/\text{mL}$ ) per well, grown statically at 37°C for one day, followed by three serial replica always on hygromycin supplemented TGY agar plates. The purified individual mutant clones (homogenotized

or partially homogenized) were replica plated on TGY-agar plates containing hygromycin and exposed either to either  $\gamma$ -rays (at a dose of 7500 Gy) or UV-rays (at a dose of 600 J m<sup>-2</sup>) or onto TGY plates supplemented with mitomycin C (at 30 ng/mL). To confirm their radiosensitive phenotype, the candidates arising from the first screening were then grown overnight in TGY2X supplemented with hygromycin and 5  $\mu$ l of undiluted or 1/10<sup>th</sup> diluted culture were spotted on plates subsequently  $\gamma$ -irradiated (7500 Gy) or UV-irradiated (600 J m<sup>-2</sup>) or onto plates supplemented with MMC. To validate our screening and homogenization procedure, we have included in our screen a control mutant by transformation of the tester strain GY10973 with *in vitro* engineered *pprA* gene inactivated by insertion of the same hygromycin cassette. Lastly, to ensure that the observed radiosensitive phenotypes are genetically linked to Tn5 insertion, all candidates sensitive to DNA damaging agents isolated in the GY10973 strain were further confirmed by backcross to the wild type *D. radiodurans* R1 strain (see Fig 1B for screening procedure).

### Screening of *D. radiodurans* mutants for sensitivity to H<sub>2</sub>O<sub>2</sub> stress

All mutants sensitive to  $\gamma$ -rays and further confirmed by backcross were analysed for their sensitivity to hydrogen peroxide (Sigma-Aldrich) by using the disc inhibition assay as follows. 1 mL of exponential phase cultures ( $A_{650} \sim 0.2$ ) was spread-plated onto TGY plates, and sterilized 6-mm-diameter filter paper discs (Dominique Dutscher) were placed on the agar surface. Then, 10  $\mu$ L of various concentrations (50, 100, 120, 150 and 200 mM) of H<sub>2</sub>O<sub>2</sub> (freshly diluted in 10 mM potassium phosphate buffer) was spotted onto each disc. After incubation at 30°C for 2 days, the diameters of the growth inhibition zones were measured. The mutants were classified into four categories depending on the diameter of growth inhibition area as described in Fig 2.

### Survival of *D. radiodurans* to different DNA damaging agents

For all experiments, the colonies were counted after 3–4 days incubation at 30°C.

- i. **Gamma irradiation.** Bacteria were grown in TGY2X or in TGY2X media supplemented with spectinomycin when they contained a plasmid or with 10 mM IPTG and spectinomycin when they contained plasmids p11559 or derivatives to an  $A_{650} \approx 1$ . The cultures were concentrated six times in TGY2X and irradiated on ice with a <sup>137</sup>Cs irradiation system (Institut Curie, Orsay, France). Following irradiation, diluted samples were plated on TGY plates, or TGY plates supplemented with spectinomycin when bacteria contained plasmid p11559 or derivatives and incubated at 30°C before the colonies were counted.
- ii. **UV irradiation.** Bacterial cultures at an  $A_{650} = 1$  were serially diluted in TGY and plated on TGY agar plates (or TGY plates supplemented with spectinomycin when bacteria contained plasmid p11559 or derivatives), subsequently exposed to UV light at a dose rate of 3.5 J/m<sup>2</sup>/s and incubated at 30°C.
- iii. **MMC treatment.** Bacterial cultures at an  $A_{650} = 1$  were serially diluted in TGY and plated on TGY plates (or TGY plates supplemented with spectinomycin when bacteria contained plasmid p11559 or derivatives) supplemented with MMC at final concentrations of 40 and 60 ng mL<sup>-1</sup> and incubated at 30°C.

### Kinetics of DNA repair measured by pulse-field gel electrophoresis

Non-irradiated or irradiated (3,800 Gy) cultures were diluted in TGY2X to an  $A_{650} = 0.3$  and incubated at 30°C. At different post-irradiation recovery times, samples (5 ml) were harvested

to prepare DNA plugs as described [93]. The agarose embedded DNA plugs were digested for 16 h at 37°C with 60 units of *NotI* restriction enzyme. After digestion, the plugs were subjected to pulsed field gel electrophoresis for 28 hours at 10°C using a CHEF MAPPER electrophoresis system (Biorad) with the following conditions: 5.5 V / cm, linear pulse of 40 s, and a switching angle of 120° (- 60° to + 60°).

## Fluorescence microscopy

The cells were fixed by adding toluene (3% final concentration) to culture aliquots, and kept at 4°C. DNA and cell membranes were stained with DAPI (40 µg/ml) and FM4-64 (50µg/ml), respectively, as previously described [24] and spotted on a thin layer of TGY2X agarose 1% for microscopy observation. The stained cells were observed using a Leica DMIRE2 microscope with a 100X objective and the appropriate fluorescence filters.

## Supporting Information

**S1 Fig. Functional categories of Tn5-inserted genes in mutants sensitive to DNA damaging agents isolated by screening onto TGY agar plates.**

(PDF)

**S1 Table. Master screening data of backcross Tn5 insertion mutants for sensitivity to  $\gamma$ - and UV rays, MMC or hydrogen peroxide (H<sub>2</sub>O<sub>2</sub>).**

(PDF)

**S2 Table. Bacterial strains and plasmids and corresponding references.**

(PDF)

**S3 Table. Overview of primers used for strains construction, cloning, mutagenesis, and AP-PCR experiments.**

(PDF)

## Acknowledgments

We thank U. Hübscher and A. Bailone for valuable discussions, A. Bailone for critical reading of the manuscript, A. Varani for identifying a representative oligonucleotide sequence used in the PCR mapping for the *D. radiodurans* genome, Y. Zivanovic for the verification of the gene annotations identified in our screening of radiosensitive mutants, and M. DuBow for polishing our English. We would also thank the Institut Curie for the use of the <sup>137</sup>Cs irradiation system.

## Author Contributions

Conceived and designed the experiments: RD TO FP CP. Performed the experiments: RD TO GC FP MD MP FC CP. Analyzed the data: RD TO FP FC SS CP. Contributed reagents/materials/analysis tools: RD TO GC FP MD MP CP. Wrote the paper: CP FC SS.

## References

1. Confalonieri F, Sommer S (2011) Bacterial and archaeal resistance to ionizing radiation. *J Phys: Conf Ser* 261: doi: [10.1088/1742-6596/1261/1081/012005](https://doi.org/10.1088/1742-6596/1261/1081/012005)
2. Slade D, Radman M (2011) Oxidative stress resistance in *Deinococcus radiodurans*. *Microbiol Mol Biol Rev* 75: 133–191. doi: [10.1128/MMBR.00015-10](https://doi.org/10.1128/MMBR.00015-10) PMID: [21372322](https://pubmed.ncbi.nlm.nih.gov/21372322/)
3. Daly MJ (2012) Death by protein damage in irradiated cells. *DNA Repair (Amst)* 11: 12–21.
4. Daly MJ, Minton KW (1995) Interchromosomal recombination in the extremely radioresistant bacterium *Deinococcus radiodurans*. *J Bacteriol* 177: 5495–5505. PMID: [7559335](https://pubmed.ncbi.nlm.nih.gov/7559335/)

5. Zahradka K, Slade D, Bailone A, Sommer S, Averbek D, et al. (2006) Reassembly of shattered chromosomes in *Deinococcus radiodurans*. *Nature* 443: 569–573. PMID: [17006450](#)
6. Slade D, Lindner AB, Paul G, Radman M (2009) Recombination and replication in DNA repair of heavily irradiated *Deinococcus radiodurans*. *Cell* 136: 1044–1055. doi: [10.1016/j.cell.2009.01.018](#) PMID: [19303848](#)
7. Daly MJ, Minton KW (1996) An alternative pathway of recombination of chromosomal fragments precedes recA-dependent recombination in the radioresistant bacterium *Deinococcus radiodurans*. *J Bacteriol* 178: 4461–4471. PMID: [8755873](#)
8. Bouthier de la Tour C, Boissard S, Norais C, Toueille M, Bentchikou E, et al. (2011) The deinococcal DdrB protein is involved in an early step of DNA double strand break repair and in plasmid transformation through its single-strand annealing activity. *DNA Repair (Amst)* 10: 1223–1231. doi: [10.1016/j.dnarep.2011.09.010](#) PMID: [21968057](#)
9. Ghosal D, Omelchenko MV, Gaidamakova EK, Matrosova VY, Vasilenko A, et al. (2005) How radiation kills cells: survival of *Deinococcus radiodurans* and *Shewanella oneidensis* under oxidative stress. *FEMS Microbiol Rev* 29: 361–375. PMID: [15808748](#)
10. Daly MJ (2009) A new perspective on radiation resistance based on *Deinococcus radiodurans*. *Nat Rev Microbiol* 7: 237–245. doi: [10.1038/nrmicro2073](#) PMID: [19172147](#)
11. Levin-Zaidman S, Englander J, Shimoni E, Sharma AK, Minton KW, et al. (2003) Ringlike structure of the *Deinococcus radiodurans* genome: a key to radioresistance? *Science* 299: 254–256. PMID: [12522252](#)
12. Zimmerman JM, Battista JR (2005) A ring-like nucleoid is not necessary for radioresistance in the Deinococcaceae. *BMC Microbiol* 5: 17. PMID: [15799787](#)
13. Tanaka M, Earl AM, Howell HA, Park MJ, Eisen JA, et al. (2004) Analysis of *Deinococcus radiodurans*'s transcriptional response to ionizing radiation and desiccation reveals novel proteins that contribute to extreme radioresistance. *Genetics* 168: 21–33. PMID: [15454524](#)
14. Makarova KS, Omelchenko MV, Gaidamakova EK, Matrosova VY, Vasilenko A, et al. (2007) *Deinococcus geothermalis*: the pool of extreme radiation resistance genes shrinks. *PLoS One* 2: e955. PMID: [17895995](#)
15. Lu H, Gao G, Xu G, Fan L, Yin L, et al. (2009) *Deinococcus radiodurans* PprI switches on DNA damage response and cellular survival networks after radiation damage. *Mol Cell Proteomics* 8: 481–494. doi: [10.1074/mcp.M800123-MCP200](#) PMID: [18953020](#)
16. Vujicic-Zagar A, Dulerio R, Le Gorrec M, Vannier F, Servant P, et al. (2009) Crystal structure of the IrrE protein, a central regulator of DNA damage repair in deinococcaceae. *J Mol Biol* 386: 704–716. doi: [10.1016/j.jmb.2008.12.062](#) PMID: [19150362](#)
17. Ludanyi M, Blanchard L, Dulerio R, Brandelet G, Bellanger L, et al. (2014) Radiation response in *Deinococcus deserti*: IrrE is a metalloprotease that cleaves repressor protein DdrO. *Mol Microbiol* 94: 434–449. doi: [10.1111/mmi.12774](#) PMID: [25170972](#)
18. Udupa KS, O'Cain PA, Mattimore V, Battista JR (1994) Novel ionizing radiation-sensitive mutants of *Deinococcus radiodurans*. *J Bacteriol* 176: 7439–7446. PMID: [8002565](#)
19. Mattimore V, Udupa KS, Berne GA, Battista JR (1995) Genetic characterization of forty ionizing radiation-sensitive strains of *Deinococcus radiodurans*: linkage information from transformation. *J Bacteriol* 177: 5232–5237. PMID: [7665511](#)
20. Liu Y, Zhou J, Omelchenko MV, Beliaev AS, Venkateswaran A, et al. (2003) Transcriptome dynamics of *Deinococcus radiodurans* recovering from ionizing radiation. *Proc Natl Acad Sci U S A* 100: 4191–4196. PMID: [12651953](#)
21. Zhang C, Wei J, Zheng Z, Ying N, Sheng D, et al. (2005) Proteomic analysis of *Deinococcus radiodurans* recovering from gamma-irradiation. *Proteomics* 5: 138–143. PMID: [15593145](#)
22. Basu B, Apte SK (2012) Gamma radiation-induced proteome of *Deinococcus radiodurans* primarily targets DNA repair and oxidative stress alleviation. *Mol Cell Proteomics* 11: M111 011734. doi: [10.1074/mcp.M111.011734](#) PMID: [21989019](#)
23. Luan H, Meng N, Fu J, Chen X, Xu X, et al. (2014) Genome-wide transcriptome and antioxidant analyses on gamma-irradiated phases of *deinococcus radiodurans* R1. *PLoS One* 9: e85649. doi: [10.1371/journal.pone.0085649](#) PMID: [24465634](#)
24. Nguyen HH, de la Tour CB, Toueille M, Vannier F, Sommer S, et al. (2009) The essential histone-like protein HU plays a major role in *Deinococcus radiodurans* nucleoid compaction. *Mol Microbiol* 73: 240–252. doi: [10.1111/j.1365-2958.2009.06766.x](#) PMID: [19570109](#)
25. Wiegand TW, Reznikoff WS (1992) Characterization of two hypertransposing Tn5 mutants. *J Bacteriol* 174: 1229–1239. PMID: [1310499](#)

26. Zhou M, Reznikoff WS (1997) Tn5 transposase mutants that alter DNA binding specificity. *J Mol Biol* 271: 362–373. PMID: [9268665](#)
27. Goryshin IY, Reznikoff WS (1998) Tn5 in vitro transposition. *J Biol Chem* 273: 7367–7374. PMID: [9516433](#)
28. Zhou M, Bhasin A, Reznikoff WS (1998) Molecular genetic analysis of transposase-end DNA sequence recognition: cooperativity of three adjacent base-pairs in specific interaction with a mutant Tn5 transposase. *J Mol Biol* 276: 913–925. PMID: [9566196](#)
29. Buchan BW, McLendon MK, Jones BD (2008) Identification of differentially regulated francisella tularensis genes by use of a newly developed Tn5-based transposon delivery system. *Appl Environ Microbiol* 74: 2637–2645. doi: [10.1128/AEM.02882-07](#) PMID: [18344342](#)
30. Larsen RA, Wilson MM, Guss AM, Metcalf WW (2002) Genetic analysis of pigment biosynthesis in *Xanthobacter autotrophicus* Py2 using a new, highly efficient transposon mutagenesis system that is functional in a wide variety of bacteria. *Arch Microbiol* 178: 193–201. PMID: [12189420](#)
31. Lecointe F, Coste G, Sommer S, Bailone A (2004) Vectors for regulated gene expression in the radioreistant bacterium *Deinococcus radiodurans*. *Gene* 336: 25–35. PMID: [15225873](#)
32. Weinreich MD, Yigit H, Reznikoff WS (1994a) Overexpression of the Tn5 transposase in *Escherichia coli* results in filamentation, aberrant nucleoid segregation, and cell death: analysis of *E. coli* and transposase suppressor mutations. *J Bacteriol* 176: 5494–5504. PMID: [8071228](#)
33. Yigit H, Reznikoff WS (1997) Examination of the Tn5 transposase overproduction phenotype in *Escherichia coli* and localization of a suppressor of transposase overproduction killing that is an allele of rpoH. *J Bacteriol* 179: 1704–1713. PMID: [9045832](#)
34. Goryshin IY, Jendrisak J, Hoffman LM, Meis R, Reznikoff WS (2000) Insertional transposon mutagenesis by electroporation of released Tn5 transposition complexes. *Nat Biotechnol* 18: 97–100. PMID: [10625401](#)
35. Hansen MT (1978) Multiplicity of genome equivalents in the radiation-resistant bacterium *Micrococcus radiodurans*. *J Bacteriol* 134: 71–75. PMID: [649572](#)
36. Sandler SJ, Mariani KJ (2000) Role of PriA in replication fork reactivation in *Escherichia coli*. *J Bacteriol* 182: 9–13. PMID: [10613856](#)
37. Polard P, Marsin S, McGovern S, Velten M, Wigley DB, et al. (2002) Restart of DNA replication in Gram-positive bacteria: functional characterisation of the *Bacillus subtilis* PriA initiator. *Nucleic Acids Res* 30: 1593–1605. PMID: [11917020](#)
38. Devigne A, Mersaoui S, Bouthier-de-la-Tour C, Sommer S, Servant P (2013) The PprA protein is required for accurate cell division of gamma-irradiated *Deinococcus radiodurans* bacteria. *DNA Repair (Amst)* 12: 265–272. doi: [10.1016/j.dnarep.2013.01.004](#) PMID: [23403184](#)
39. Kota S, Charaka VK, Ringgaard S, Waldor MK, Misra HS (2014a) PprA contributes to *Deinococcus radiodurans* resistance to nalidixic acid, genome maintenance after DNA damage and interacts with deinococcal topoisomerases. *PLoS One* 9: e85288. doi: [10.1371/journal.pone.0085288](#) PMID: [24454836](#)
40. Kota S, Charaka VK, Misra HS (2014b) PprA, a pleiotropic protein for radioresistance, works through DNA gyrase and shows cellular dynamics during postirradiation recovery in *Deinococcus radiodurans*. *J Genet* 93: 349–354. PMID: [25189229](#)
41. Bentchikou E, Servant P, Coste G, Sommer S (2010) A major role of the RecFOR pathway in DNA double-strand-break repair through ESDSA in *Deinococcus radiodurans*. *PLoS Genet* 6: e1000774. doi: [10.1371/journal.pgen.1000774](#) PMID: [20090937](#)
42. Jolivet E, Lecointe F, Coste G, Satoh K, Narumi I, et al. (2006) Limited concentration of RecA delays DNA double-strand break repair in *Deinococcus radiodurans* R1. *Mol Microbiol* 59: 338–349. PMID: [16359339](#)
43. Krysan PJ, Young JC, Sussman MR (1999) T-DNA as an insertional mutagen in *Arabidopsis*. *Plant Cell* 11: 2283–2290. PMID: [10590158](#)
44. Devigne A, Ithubirde S, Bouthier-de-la-Tour C, Passot F, Mathieu M, et al. (2015) DdrO is an essential protein that regulates the radiation desiccation response and the apoptotic-like cell death in the radioreistant *Deinococcus radiodurans* bacterium. *Mol Microbiol* In Press.
45. Wang L, Xu G, Chen H, Zhao Y, Xu N, et al. (2008) DrRRA: a novel response regulator essential for the extreme radioresistance of *Deinococcus radiodurans*. *Mol Microbiol* 67: 1211–1222. doi: [10.1111/j.1365-2958.2008.06113.x](#) PMID: [18208531](#)
46. Rajpurohit YS, Misra HS (2010) Characterization of a DNA damage-inducible membrane protein kinase from *Deinococcus radiodurans* and its role in bacterial radioresistance and DNA strand break repair. *Mol Microbiol* 77: 1470–1482. doi: [10.1111/j.1365-2958.2010.07301.x](#) PMID: [20633226](#)



47. Rajpurohit YS, Misra HS (2013) Structure-function study of deinococcal serine/threonine protein kinase implicates its kinase activity and DNA repair protein phosphorylation roles in radioresistance of *Deinococcus radiodurans*. *Int J Biochem Cell Biol* 45: 2541–2552. doi: [10.1016/j.biocel.2013.08.011](https://doi.org/10.1016/j.biocel.2013.08.011) PMID: [23994692](https://pubmed.ncbi.nlm.nih.gov/23994692/)
48. Mailloux RJ, Lemire J, Appanna VD (2011) Metabolic networks to combat oxidative stress in *Pseudomonas fluorescens*. *Antonie Van Leeuwenhoek* 99: 433–442. doi: [10.1007/s10482-010-9538-x](https://doi.org/10.1007/s10482-010-9538-x) PMID: [21153706](https://pubmed.ncbi.nlm.nih.gov/21153706/)
49. Daly MJ, Gaidamakova EK, Matrosova VY, Kiang JG, Fukumoto R, et al. (2010) Small-molecule antioxidant proteome-shields in *Deinococcus radiodurans*. *PLoS One* 5: e12570. doi: [10.1371/journal.pone.0012570](https://doi.org/10.1371/journal.pone.0012570) PMID: [20838443](https://pubmed.ncbi.nlm.nih.gov/20838443/)
50. Nachin L, Loiseau L, Expert D, Barras F (2003) SufC: an unorthodox cytoplasmic ABC/ATPase required for [Fe-S] biogenesis under oxidative stress. *EMBO J* 22: 427–437. PMID: [12554644](https://pubmed.ncbi.nlm.nih.gov/12554644/)
51. Ayala-Castro C, Saini A, Outten FW (2008) Fe-S cluster assembly pathways in bacteria. *Microbiol Mol Biol Rev* 72: 110–125, table of contents. doi: [10.1128/MMBR.00034-07](https://doi.org/10.1128/MMBR.00034-07) PMID: [18322036](https://pubmed.ncbi.nlm.nih.gov/18322036/)
52. Flint DH, Tuminello JF, Emptage MH (1993) The inactivation of Fe-S cluster containing hydro-lyases by superoxide. *J Biol Chem* 268: 22369–22376. PMID: [8226748](https://pubmed.ncbi.nlm.nih.gov/8226748/)
53. Liedert C, Peltola M, Bernhardt J, Neubauer P, Salkinoja-Salonen M (2012) Physiology of resistant *Deinococcus geothermalis* bacterium aerobically cultivated in low-manganese medium. *J Bacteriol* 194: 1552–1561. doi: [10.1128/JB.06429-11](https://doi.org/10.1128/JB.06429-11) PMID: [22228732](https://pubmed.ncbi.nlm.nih.gov/22228732/)
54. Dean CJ, Little JG, Serianni RW (1970) The control of post irradiation DNA breakdown in *Micrococcus radiodurans*. *Biochem Biophys Res Commun* 39: 126–134. PMID: [5438290](https://pubmed.ncbi.nlm.nih.gov/5438290/)
55. Kobayashi I, Tamura T, Sghaier H, Narumi I, Yamaguchi S, et al. (2006) Characterization of monofunctional catalase KatA from radioresistant bacterium *Deinococcus radiodurans*. *J Biosci Bioeng* 101: 315–321. PMID: [16716939](https://pubmed.ncbi.nlm.nih.gov/16716939/)
56. Markillie LM, Varnum SM, Hradecky P, Wong KK (1999) Targeted mutagenesis by duplication insertion in the radioresistant bacterium *Deinococcus radiodurans*: radiation sensitivities of catalase (katA) and superoxide dismutase (sodA) mutants. *J Bacteriol* 181: 666–669. PMID: [9882685](https://pubmed.ncbi.nlm.nih.gov/9882685/)
57. Hua Y, Narumi I, Gao G, Tian B, Satoh K, et al. (2003) PprI: a general switch responsible for extreme radioresistance of *Deinococcus radiodurans*. *Biochem Biophys Res Commun* 306: 354–360. PMID: [12804570](https://pubmed.ncbi.nlm.nih.gov/12804570/)
58. Das AD, Misra HS (2012) DR2417, a hypothetical protein characterized as a novel beta-CASP family nuclease in radiation resistant bacterium, *Deinococcus radiodurans*. *Biochim Biophys Acta* 1820: 1052–1061. doi: [10.1016/j.bbagen.2012.03.014](https://doi.org/10.1016/j.bbagen.2012.03.014) PMID: [22503789](https://pubmed.ncbi.nlm.nih.gov/22503789/)
59. Mehne FM, Gunka K, Eilers H, Herzberg C, Kaefer V, et al. (2013) Cyclic di-AMP homeostasis in *Bacillus subtilis*: both lack and high level accumulation of the nucleotide are detrimental for cell growth. *J Biol Chem* 288: 2004–2017. doi: [10.1074/jbc.M112.395491](https://doi.org/10.1074/jbc.M112.395491) PMID: [23192352](https://pubmed.ncbi.nlm.nih.gov/23192352/)
60. Solov'yev V, Salamov A (2011) Automatic Annotation of Microbial Genomes and Metagenomic Sequences. In: Li RW, editor. *Metagenomics and its Applications in Agriculture, Biomedicine and Environmental Studies*: Nova Science Publishers. pp. 61–78.
61. Oppenheimer-Shaanan Y, Wexselblatt E, Katzhendler J, Yavin E, Ben-Yehuda S (2011) c-di-AMP reports DNA integrity during sporulation in *Bacillus subtilis*. *EMBO Rep* 12: 594–601. doi: [10.1038/embor.2011.77](https://doi.org/10.1038/embor.2011.77) PMID: [21566650](https://pubmed.ncbi.nlm.nih.gov/21566650/)
62. Romling U (2008) Great times for small molecules: c-di-AMP, a second messenger candidate in Bacteria and Archaea. *Sci Signal* 1: pe39. doi: [10.1126/scisignal.133pe39](https://doi.org/10.1126/scisignal.133pe39) PMID: [18714086](https://pubmed.ncbi.nlm.nih.gov/18714086/)
63. Corrigan RM, Campeotto I, Jeganathan T, Roelofs KG, Lee VT, et al. (2013) Systematic identification of conserved bacterial c-di-AMP receptor proteins. *Proc Natl Acad Sci U S A* 110: 9084–9089. doi: [10.1073/pnas.1300595110](https://doi.org/10.1073/pnas.1300595110) PMID: [23671116](https://pubmed.ncbi.nlm.nih.gov/23671116/)
64. Kalia D, Merey G, Nakayama S, Zheng Y, Zhou J, et al. (2013) Nucleotide, c-di-GMP, c-di-AMP, cGMP, cAMP, (p)ppGpp signaling in bacteria and implications in pathogenesis. *Chem Soc Rev* 42: 305–341. doi: [10.1039/c2cs35206k](https://doi.org/10.1039/c2cs35206k) PMID: [23023210](https://pubmed.ncbi.nlm.nih.gov/23023210/)
65. Zhang L, Li W, He ZG (2013) DarR, a TetR-like transcriptional factor, is a cyclic di-AMP-responsive repressor in *Mycobacterium smegmatis*. *J Biol Chem* 288: 3085–3096. doi: [10.1074/jbc.M112.428110](https://doi.org/10.1074/jbc.M112.428110) PMID: [23250743](https://pubmed.ncbi.nlm.nih.gov/23250743/)
66. Corrigan RM, Abbott JC, Burhenne H, Kaefer V, Grundling A (2011) c-di-AMP is a new second messenger in *Staphylococcus aureus* with a role in controlling cell size and envelope stress. *PLoS Pathog* 7: e1002217. doi: [10.1371/journal.ppat.1002217](https://doi.org/10.1371/journal.ppat.1002217) PMID: [21909268](https://pubmed.ncbi.nlm.nih.gov/21909268/)
67. Luo Y, Helmann JD (2012) Analysis of the role of *Bacillus subtilis* sigma(M) in beta-lactam resistance reveals an essential role for c-di-AMP in peptidoglycan homeostasis. *Mol Microbiol* 83: 623–639. doi: [10.1111/j.1365-2958.2011.07953.x](https://doi.org/10.1111/j.1365-2958.2011.07953.x) PMID: [22211522](https://pubmed.ncbi.nlm.nih.gov/22211522/)

68. Kaplan Zeevi M, Shafir NS, Shaham S, Friedman S, Sigal N, et al. (2013) *Listeria monocytogenes* multi-drug resistance transporters and cyclic di-AMP, which contribute to type I interferon induction, play a role in cell wall stress. *J Bacteriol* 195: 5250–5261. doi: [10.1128/JB.00794-13](https://doi.org/10.1128/JB.00794-13) PMID: [24056102](https://pubmed.ncbi.nlm.nih.gov/24056102/)
69. Bai Y, Yang J, Zarrella TM, Zhang Y, Metzger DW, et al. (2014) Cyclic di-AMP impairs potassium uptake mediated by a cyclic di-AMP binding protein in *Streptococcus pneumoniae*. *J Bacteriol* 196: 614–623. doi: [10.1128/JB.01041-13](https://doi.org/10.1128/JB.01041-13) PMID: [24272783](https://pubmed.ncbi.nlm.nih.gov/24272783/)
70. Nelson JW, Sudarsan N, Furukawa K, Weinberg Z, Wang JX, et al. (2013) Riboswitches in eubacteria sense the second messenger c-di-AMP. *Nat Chem Biol* 9: 834–839. doi: [10.1038/nchembio.1363](https://doi.org/10.1038/nchembio.1363) PMID: [24141192](https://pubmed.ncbi.nlm.nih.gov/24141192/)
71. Bejerano-Sagie M, Oppenheimer-Shaanan Y, Berlatzky I, Rouvinski A, Meyerovich M, et al. (2006) A checkpoint protein that scans the chromosome for damage at the start of sporulation in *Bacillus subtilis*. *Cell* 125: 679–690. PMID: [16713562](https://pubmed.ncbi.nlm.nih.gov/16713562/)
72. Rigali S, Derouaux A, Giannotta F, Dusart J (2002) Subdivision of the helix-turn-helix GntR family of bacterial regulators in the FadR, HutC, MocR, and YtrA subfamilies. *J Biol Chem* 277: 12507–12515. PMID: [11756427](https://pubmed.ncbi.nlm.nih.gov/11756427/)
73. Makarova KS, Aravind L, Wolf YI, Tatusov RL, Minton KW, et al. (2001) Genome of the extremely radiation-resistant bacterium *Deinococcus radiodurans* viewed from the perspective of comparative genomics. *Microbiol Mol Biol Rev* 65: 44–79. PMID: [11238985](https://pubmed.ncbi.nlm.nih.gov/11238985/)
74. Bender RA (2012) Regulation of the histidine utilization (hut) system in bacteria. *Microbiol Mol Biol Rev* 76: 565–584. doi: [10.1128/MMBR.00014-12](https://doi.org/10.1128/MMBR.00014-12) PMID: [22933560](https://pubmed.ncbi.nlm.nih.gov/22933560/)
75. Schroder J, Maus I, Ostermann AL, Kogler AC, Tauch A (2012) Binding of the lclR-type regulator HutR in the histidine utilization (hut) gene cluster of the human pathogen *Corynebacterium resistens* DSM 45100. *FEMS Microbiol Lett* 331: 136–143. doi: [10.1111/j.1574-6968.2012.02564.x](https://doi.org/10.1111/j.1574-6968.2012.02564.x) PMID: [22462578](https://pubmed.ncbi.nlm.nih.gov/22462578/)
76. Shahbadian K, Jamalli A, Zig L, Putzer H (2009) RNase Y, a novel endoribonuclease, initiates riboswitch turnover in *Bacillus subtilis*. *EMBO J* 28: 3523–3533. doi: [10.1038/emboj.2009.283](https://doi.org/10.1038/emboj.2009.283) PMID: [19779461](https://pubmed.ncbi.nlm.nih.gov/19779461/)
77. Commichau FM, Rothe FM, Herzberg C, Wagner E, Hellwig D, et al. (2009) Novel activities of glycolytic enzymes in *Bacillus subtilis*: interactions with essential proteins involved in mRNA processing. *Mol Cell Proteomics* 8: 1350–1360. doi: [10.1074/mcp.M800546-MCP200](https://doi.org/10.1074/mcp.M800546-MCP200) PMID: [19193632](https://pubmed.ncbi.nlm.nih.gov/19193632/)
78. Yao S, Bechhofer DH (2010) Initiation of decay of *Bacillus subtilis* rpsO mRNA by endoribonuclease RNase Y. *J Bacteriol* 192: 3279–3286. doi: [10.1128/JB.00230-10](https://doi.org/10.1128/JB.00230-10) PMID: [20418391](https://pubmed.ncbi.nlm.nih.gov/20418391/)
79. Durand S, Gilet L, Bessieres P, Nicolas P, Condon C (2012) Three essential ribonucleases-RNase Y, J1, and III-control the abundance of a majority of *Bacillus subtilis* mRNAs. *PLoS Genet* 8: e1002520. doi: [10.1371/journal.pgen.1002520](https://doi.org/10.1371/journal.pgen.1002520) PMID: [22412379](https://pubmed.ncbi.nlm.nih.gov/22412379/)
80. Laalami S, Bessieres P, Rocca A, Zig L, Nicolas P, et al. (2013) *Bacillus subtilis* RNase Y activity in vivo analysed by tiling microarrays. *PLoS One* 8: e54062. doi: [10.1371/journal.pone.0054062](https://doi.org/10.1371/journal.pone.0054062) PMID: [23326572](https://pubmed.ncbi.nlm.nih.gov/23326572/)
81. Hunt A, Rawlins JP, Thomaidis HB, Errington J (2006) Functional analysis of 11 putative essential genes in *Bacillus subtilis*. *Microbiology* 152: 2895–2907. PMID: [17005971](https://pubmed.ncbi.nlm.nih.gov/17005971/)
82. Figaro S, Durand S, Gilet L, Cayet N, Sachse M, et al. (2013) *Bacillus subtilis* mutants with knockouts of the genes encoding ribonucleases RNase Y and RNase J1 are viable, with major defects in cell morphology, sporulation, and competence. *J Bacteriol* 195: 2340–2348. doi: [10.1128/JB.00164-13](https://doi.org/10.1128/JB.00164-13) PMID: [23504012](https://pubmed.ncbi.nlm.nih.gov/23504012/)
83. Ogura Y, Imai Y, Ogasawara N, Moriya S (2001) Autoregulation of the dnaA-dnaN operon and effects of DnaA protein levels on replication initiation in *Bacillus subtilis*. *J Bacteriol* 183: 3833–3841. PMID: [11395445](https://pubmed.ncbi.nlm.nih.gov/11395445/)
84. Byrne RT, Chen SH, Wood EA, Cabot EL, Cox MM (2014) *Escherichia coli* genes and pathways involved in surviving extreme exposure to ionizing radiation. *J Bacteriol* 196: 3534–3545. doi: [10.1128/JB.01589-14](https://doi.org/10.1128/JB.01589-14) PMID: [25049088](https://pubmed.ncbi.nlm.nih.gov/25049088/)
85. Harris DR, Pollock SV, Wood EA, Goiffon RJ, Klingele AJ, et al. (2009) Directed evolution of ionizing radiation resistance in *Escherichia coli*. *J Bacteriol* 191: 5240–5252. doi: [10.1128/JB.00502-09](https://doi.org/10.1128/JB.00502-09) PMID: [19502398](https://pubmed.ncbi.nlm.nih.gov/19502398/)
86. Meima R, Rothfuss HM, Gewin L, Lidstrom ME (2001) Promoter cloning in the radioresistant bacterium *Deinococcus radiodurans*. *J Bacteriol* 183: 3169–3175. PMID: [11325946](https://pubmed.ncbi.nlm.nih.gov/11325946/)
87. Bonacossa de Almeida C, Coste G, Sommer S, Bailone A (2002) Quantification of RecA protein in *Deinococcus radiodurans* reveals involvement of RecA, but not LexA, in its regulation. *Mol Genet Genomics* 268: 28–41. PMID: [12242496](https://pubmed.ncbi.nlm.nih.gov/12242496/)

88. Menecier S, Coste G, Servant P, Bailone A, Sommer S (2004) Mismatch repair ensures fidelity of replication and recombination in the radioresistant organism *Deinococcus radiodurans*. *Mol Genet Genomics* 272: 460–469. PMID: [15503140](#)
89. Norais C, Servant P, Bouthier-de-la-Tour C, Coureux PD, Ithurbide S, et al. (2013) The *Deinococcus radiodurans* DR1245 protein, a DdrB partner homologous to YbjN proteins and reminiscent of type III secretion system chaperones. *PLoS One* 8: e56558. doi: [10.1371/journal.pone.0056558](#) PMID: [23441204](#)
90. Köstner M, Schmidt B, Bertram R, Hillen W (2006) Generating tetracycline-inducible auxotrophy in *Escherichia coli* and *Salmonella enterica* serovar Typhimurium by using an insertion element and a hyperactive transposase. *Appl Environ Microbiol* 72: 4717–4725. PMID: [16820464](#)
91. Knobloch JK, Nedelmann M, Kiel K, Bartscht K, Horstkotte MA, et al. (2003) Establishment of an arbitrary PCR for rapid identification of Tn917 insertion sites in *Staphylococcus epidermidis*: characterization of biofilm-negative and nonmucoid mutants. *Appl Environ Microbiol* 69: 5812–5818. PMID: [14532029](#)
92. Das S, Noe JC, Paik S, Kitten T (2005) An improved arbitrary primed PCR method for rapid characterization of transposon insertion sites. *J Microbiol Methods* 63: 89–94. PMID: [16157212](#)
93. Harris DR, Tanaka M, Saveliev SV, Jolivet E, Earl AM, et al. (2004) Preserving genome integrity: the DdrA protein of *Deinococcus radiodurans* R1. *PLoS Biol* 2: e304. PMID: [15361932](#)
94. Weinreich MD, Gasch A, Reznikoff WS (1994b) Evidence that the cis preference of the Tn5 transposase is caused by nonproductive multimerization. *Genes Dev* 8: 2363–2374. PMID: [7958902](#)
